# Supplementary material for: Regiospecific inverse electron demand Diels–Alder reactions of 7-methylcoumarin-4-azadienes
Source: Royal Society of Chemistry journal article supplement (doi:10.1039/c5ra06262d), 2015-01-01
Supplement: c5ra06262d1.pdf [file c5ra06262d1.pdf]

# Regiospecific Inverse Electron Demand Diels-Alder Reaction of 7-Methylcoumarin-4-azadienes

Kailas K. Sanap<sup>a</sup>, and Shriniwas D. Samant<sup>b\*</sup>

<sup>a</sup>*Department of Chemistry, N.B. Mehta Science College, Bordi, Palghar 400 701, Maharashtra, India.*

<sup>b</sup>*Department of Chemistry, Institute of Chemical Technology, Nathalal Parikh Marg, Matunga, Mumbai  
400 019, Maharashtra, India.*

## Supporting Info

1. <sup>1</sup>H and <sup>13</sup>C NMR Spectra

2-21

---

\* Corresponding author. Tel.: +91 22 3361 2606; fax: +91 22 2269 2102; E-mail address: [samantsd@yahoo.com](mailto:samantsd@yahoo.com) (S. D. Samant)

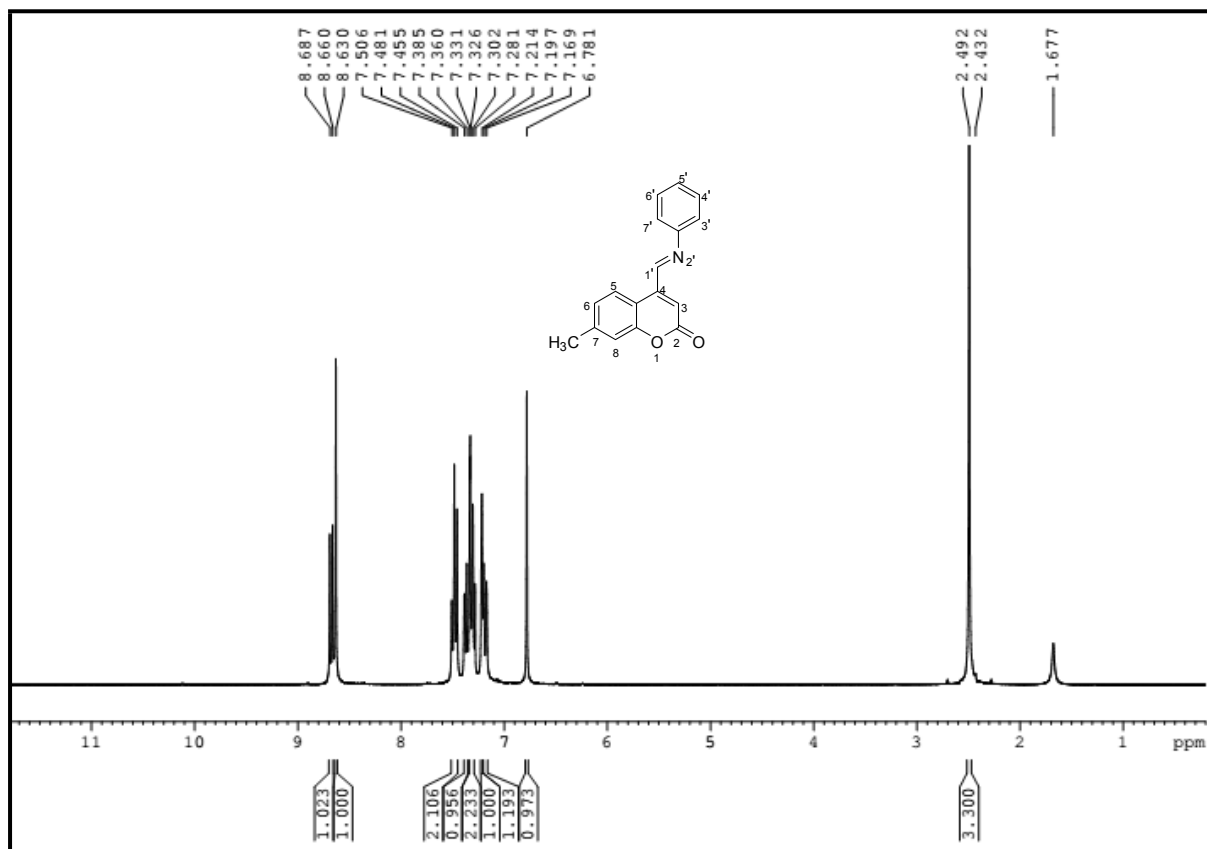

<sup>1</sup>H NMR spectrum (CDCl<sub>3</sub>, 300 MHz) of 7-methyl-coumarin-4-azadiene (**1a**)

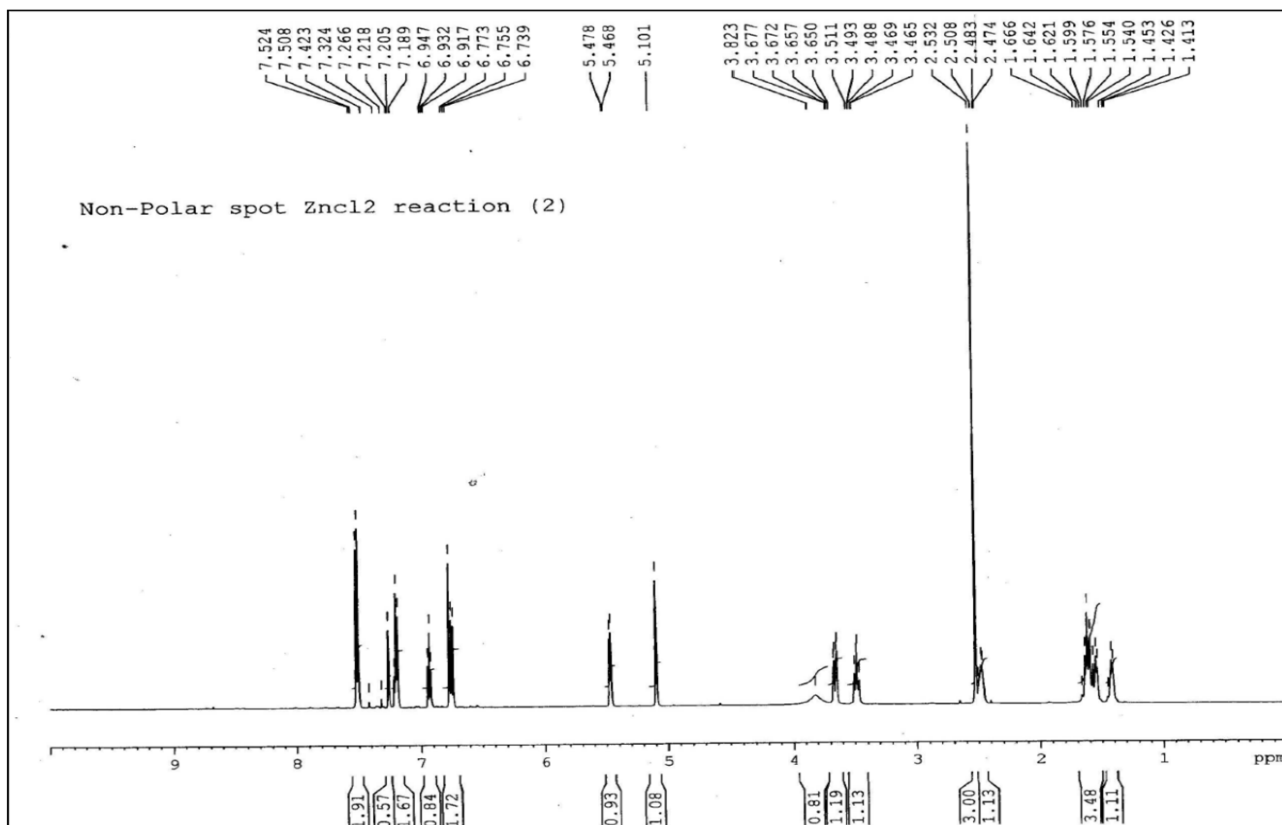

<sup>1</sup>H NMR (500 MHz) spectrum of **11a**

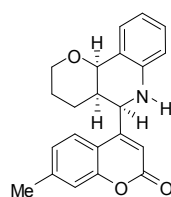

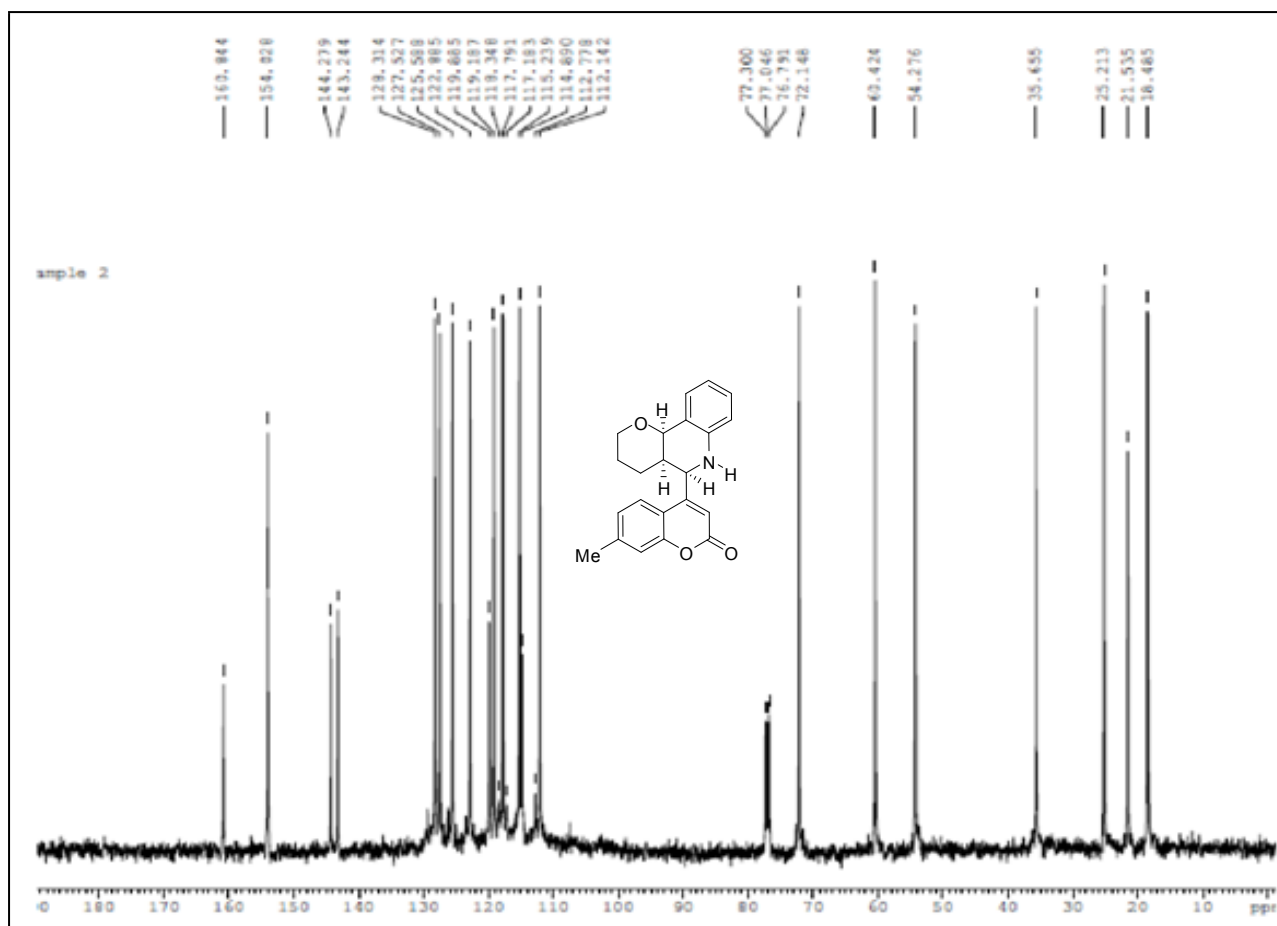

$^{13}\text{C}$  NMR (125 MHz) spectrum of **11a**

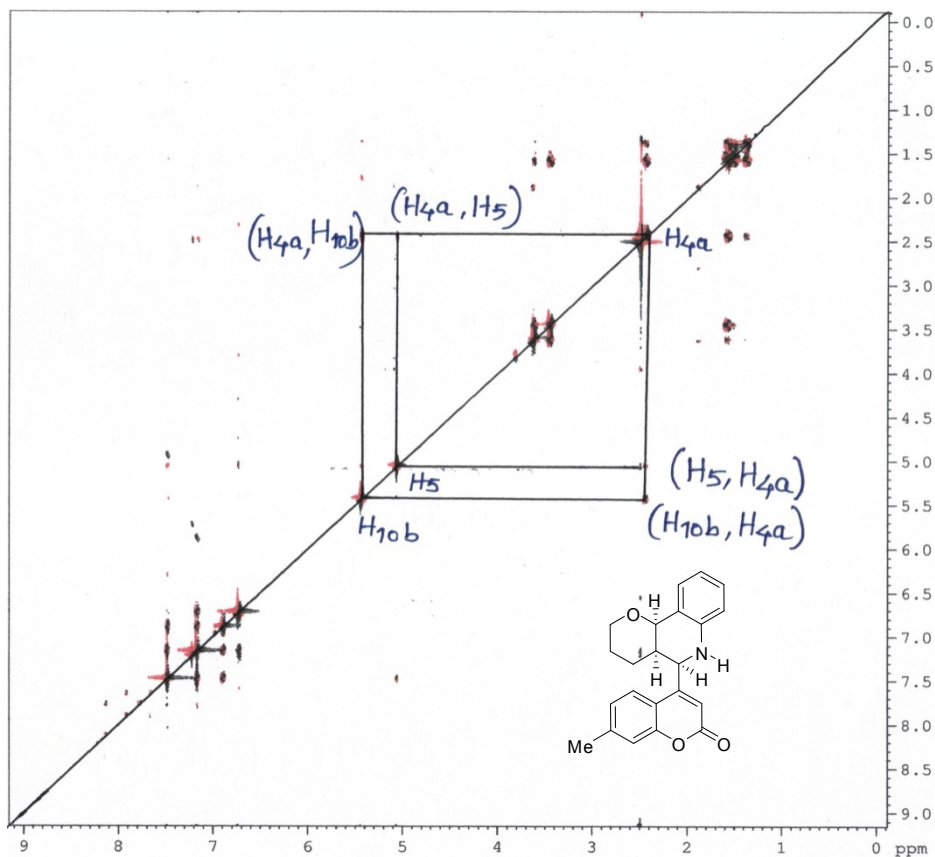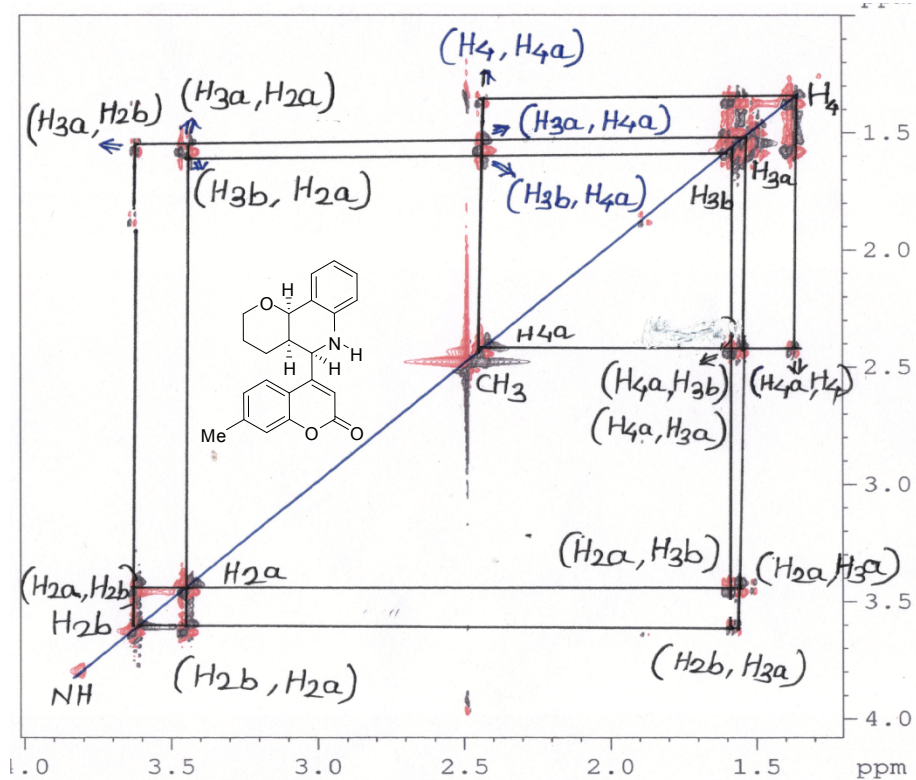

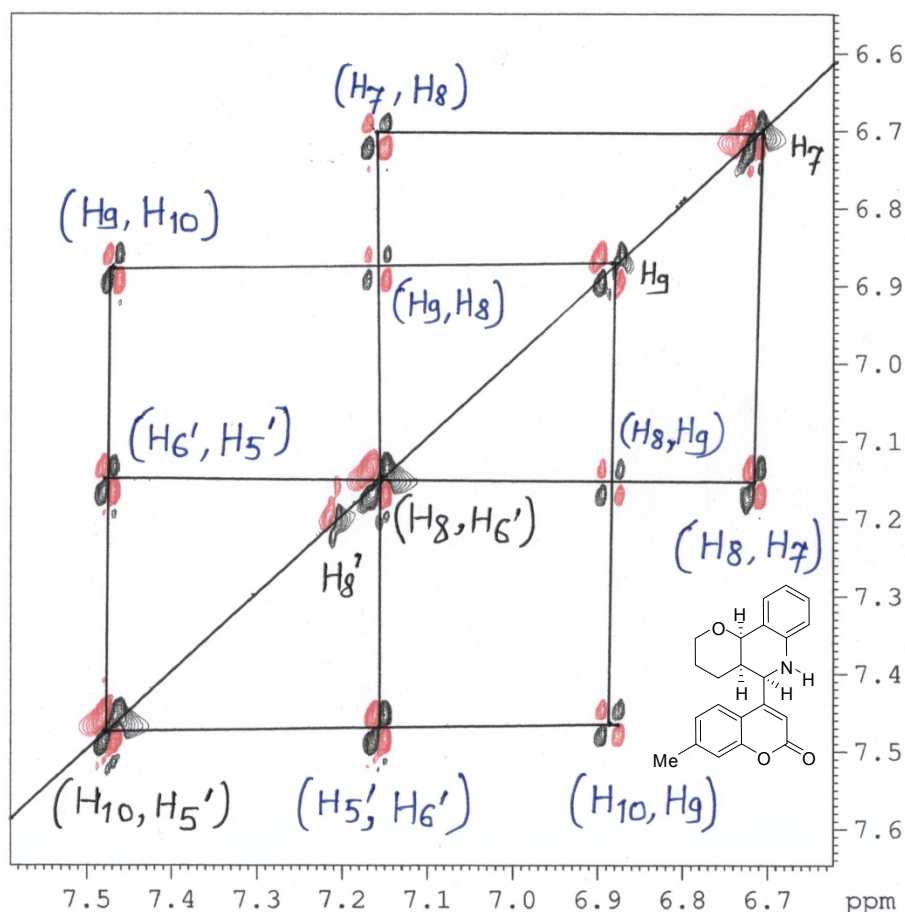

(c) DQF-COSY zoomed spectrum of **11a (A)**

**Table S1** Diagonal peaks and their corresponding off-diagonal peaks of **11a (A)**

| Entry | Diagonal peak   | Off-diagonal peaks                                                                                                                                    | Entry | Diagonal Peak    | Off-diagonal peaks                                                      |
|-------|-----------------|-------------------------------------------------------------------------------------------------------------------------------------------------------|-------|------------------|-------------------------------------------------------------------------|
| 1     | H <sub>4</sub>  | (H <sub>4</sub> , H <sub>4a</sub> ) (H <sub>4</sub> , H <sub>3a</sub> )                                                                               | 10    | H <sub>10b</sub> | (H <sub>10b</sub> , H <sub>4a</sub> )                                   |
| 2     | H <sub>3a</sub> | (H <sub>3a</sub> , H <sub>4</sub> ) (H <sub>3a</sub> , H <sub>4a</sub> )<br>(H <sub>3a</sub> , H <sub>2a</sub> ) (H <sub>3a</sub> , H <sub>2b</sub> ) | 11    | H <sub>10</sub>  | (H <sub>10</sub> , H <sub>9</sub> )                                     |
| 3     | H <sub>3b</sub> | (H <sub>3b</sub> , H <sub>2a</sub> ) (H <sub>3b</sub> , H <sub>4a</sub> )<br>(H <sub>3b</sub> , H <sub>2b</sub> )                                     | 12    | H <sub>3'</sub>  | -                                                                       |
| 4     | H <sub>4a</sub> | (H <sub>4a</sub> , H <sub>4</sub> ) (H <sub>4a</sub> , H <sub>5</sub> ) (H <sub>4a</sub> ,<br>H <sub>10b</sub> )                                      | 13    | H <sub>8</sub>   | (H <sub>8</sub> , H <sub>7</sub> ), (H <sub>8</sub> , H <sub>9</sub> )  |
| 5     | CH <sub>3</sub> | -                                                                                                                                                     | 14    | H <sub>6'</sub>  | (H <sub>6'</sub> , H <sub>5'</sub> )                                    |
| 6     | H <sub>2a</sub> | (H <sub>2a</sub> , H <sub>3a</sub> ), (H <sub>2a</sub> , H <sub>3b</sub> )<br>(H <sub>2a</sub> , H <sub>2b</sub> )                                    | 15    | H <sub>9</sub>   | (H <sub>9</sub> , H <sub>8</sub> ), (H <sub>9</sub> , H <sub>10</sub> ) |
| 7     | H <sub>2b</sub> | (H <sub>2b</sub> , H <sub>3a</sub> ), (H <sub>2b</sub> , H <sub>2a</sub> )                                                                            | 16    | H <sub>8'</sub>  | -                                                                       |
| 8     | NH              | -                                                                                                                                                     | 17    | H <sub>7</sub>   | (H <sub>7</sub> , H <sub>8</sub> )                                      |
| 9     | H <sub>5</sub>  | (H <sub>5</sub> , H <sub>4a</sub> )                                                                                                                   | 18    | H <sub>5'</sub>  | (H <sub>5'</sub> , H <sub>6'</sub> )                                    |

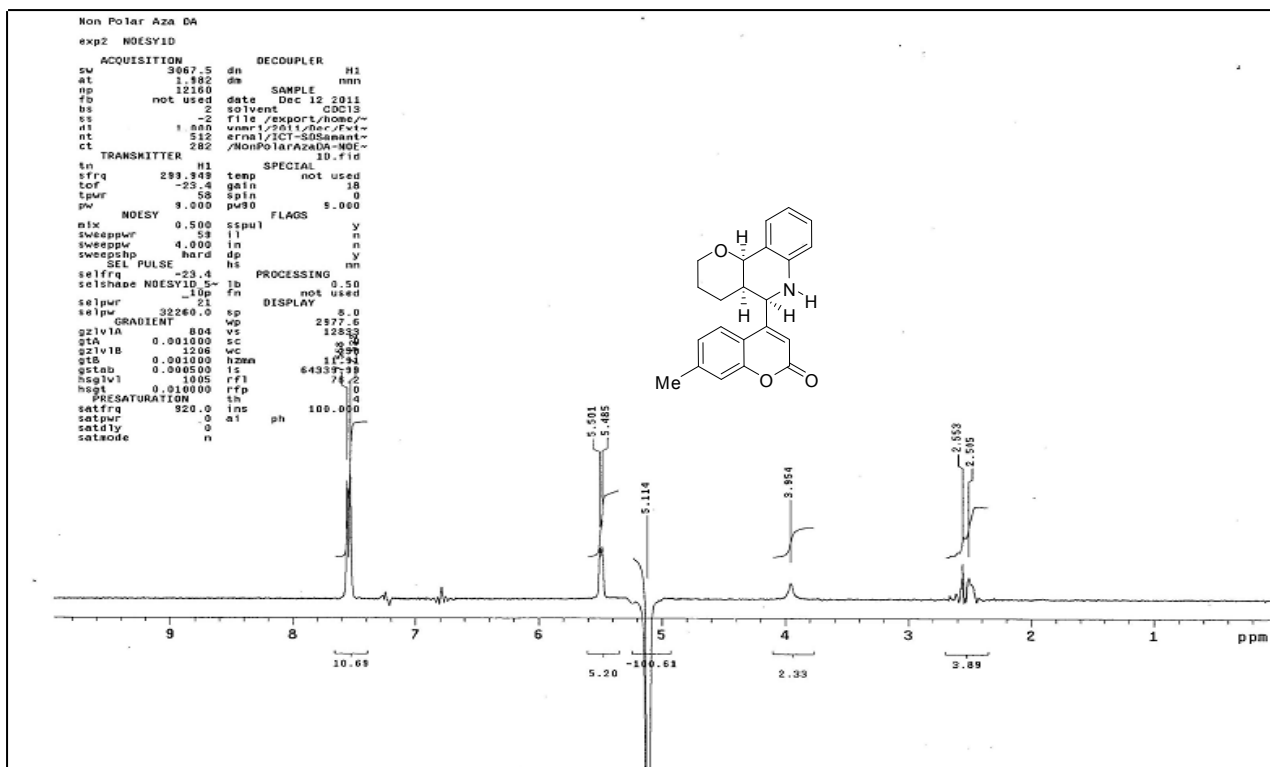

NOE spectrum of **11a**

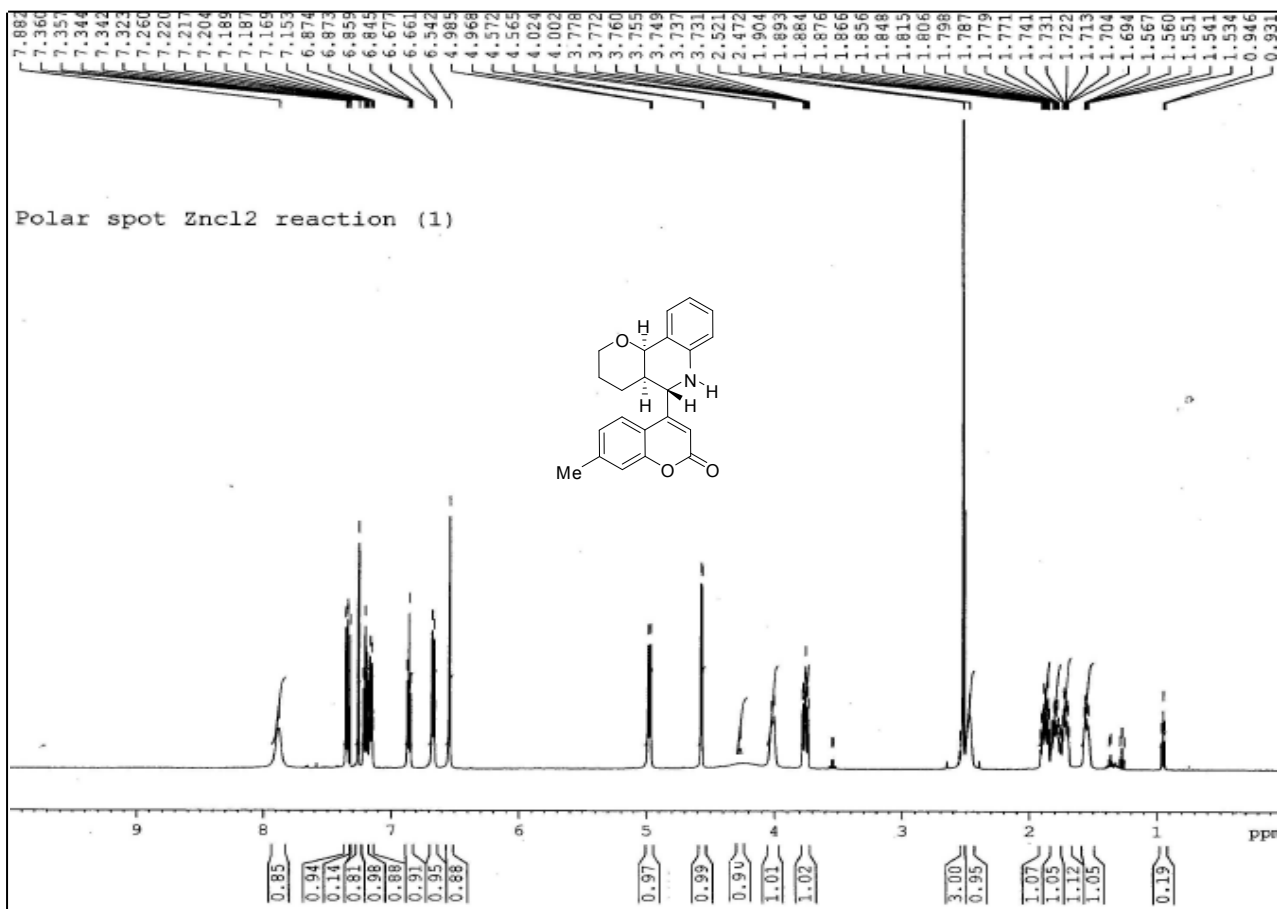

<sup>1</sup>H NMR (500 MHz) spectrum of **11a'**

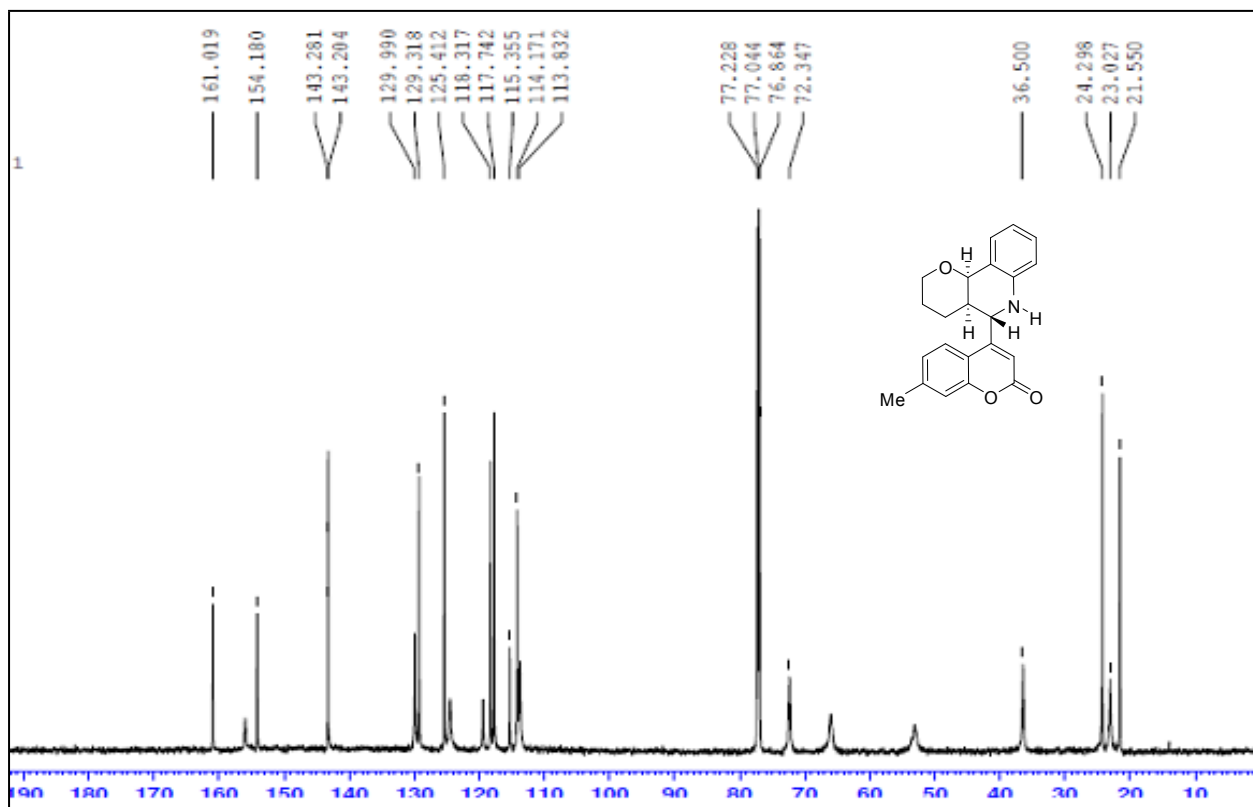

$^{13}\text{C}$  NMR (125 MHz) spectrum of **11a'**

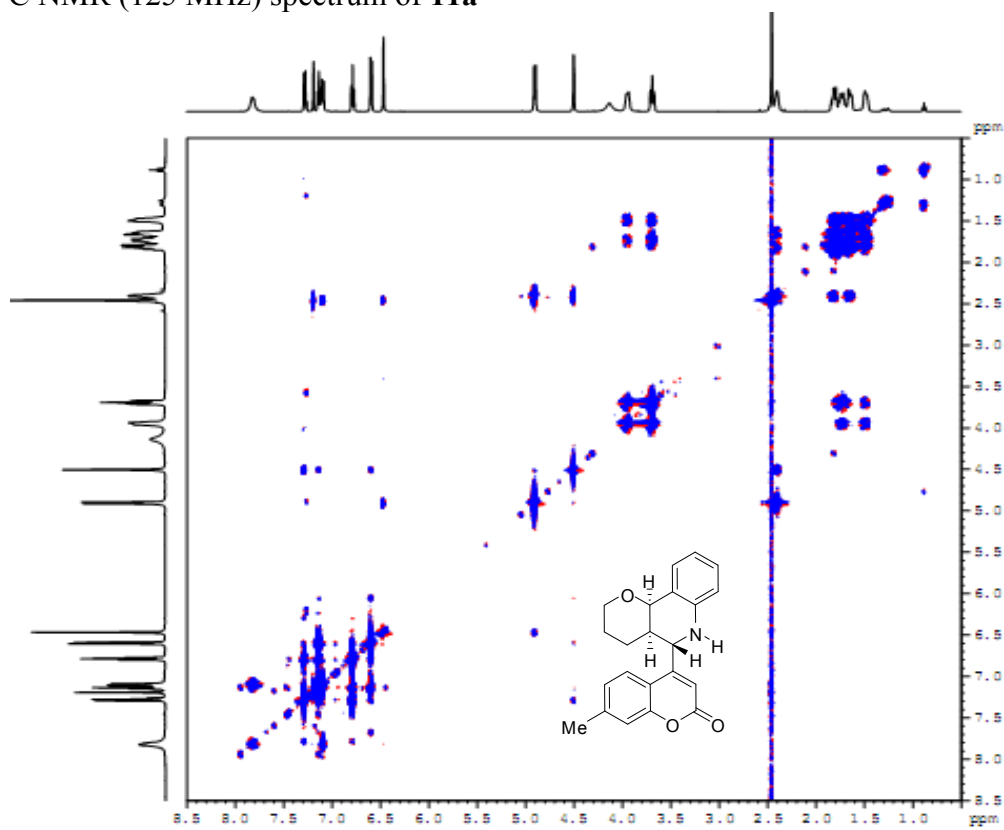

(a) DQF spectrum of **11a'** (B)-COSY



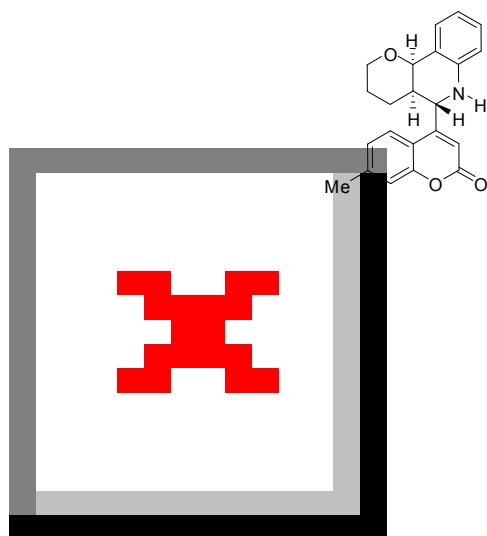

**(b) DQF-COSY zoomed spectrum of 11a' (B)**

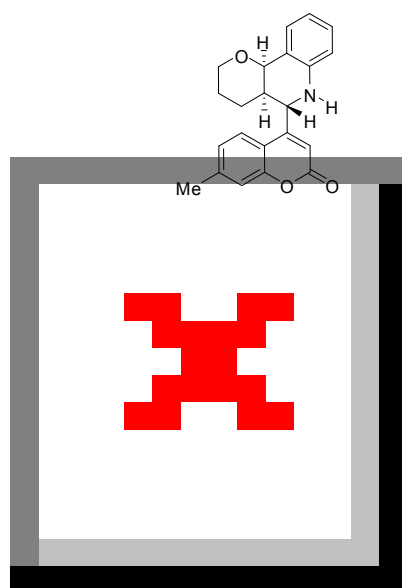

**(c) DQF-COSY zoomed spectrum of 11a' (B)**

**Table S2** Diagonal peaks and their corresponding off-diagonal peaks of **11a'** (B)

| Entry | Diagonal peak   | Off-diagonal peaks                                                                                            | Entry | Diagonal peak    | Off-diagonal peaks                                                      |
|-------|-----------------|---------------------------------------------------------------------------------------------------------------|-------|------------------|-------------------------------------------------------------------------|
| 1     | H <sub>3a</sub> | (H <sub>3a</sub> , H <sub>4</sub> ) (H <sub>3a</sub> , H <sub>2a</sub> )                                      | 10    | H <sub>10b</sub> | (H <sub>10b</sub> , H <sub>4a</sub> )                                   |
| 2     | H <sub>3b</sub> | (H <sub>3b</sub> , H <sub>2a</sub> )                                                                          | 11    | H <sub>3'</sub>  | -                                                                       |
| 3     | H <sub>4</sub>  | (H <sub>4</sub> , H <sub>4a</sub> )                                                                           | 12    | H <sub>7</sub>   | (H <sub>7</sub> , H <sub>8</sub> )                                      |
| 4     | H <sub>4a</sub> | (H <sub>4a</sub> , H <sub>4</sub> ) (H <sub>4a</sub> , H <sub>5</sub> ) (H <sub>4a</sub> , H <sub>10b</sub> ) | 13    | H <sub>9</sub>   | (H <sub>9</sub> , H <sub>8</sub> ), (H <sub>9</sub> , H <sub>10</sub> ) |
| 5     | CH <sub>3</sub> | -                                                                                                             | 14    | H <sub>6'</sub>  | (H <sub>6'</sub> , H <sub>5'</sub> )                                    |
| 6     | H <sub>2a</sub> | (H <sub>2a</sub> , H <sub>3b</sub> ), (H <sub>2a</sub> , H <sub>2b</sub> )                                    | 15    | H <sub>8</sub>   | (H <sub>8</sub> , H <sub>7</sub> ), (H <sub>8</sub> , H <sub>9</sub> )  |
| 7     | H <sub>2b</sub> | (H <sub>2b</sub> , H <sub>3a</sub> ), (H <sub>2b</sub> , H <sub>2a</sub> )                                    | 16    | H <sub>10</sub>  | (H <sub>10</sub> , H <sub>9</sub> )                                     |
| 8     | NH              | -                                                                                                             | 17    | H <sub>8'</sub>  | -                                                                       |
| 9     | H <sub>5</sub>  | (H <sub>5</sub> , H <sub>4a</sub> )                                                                           | 18    | H <sub>5'</sub>  | (H <sub>5'</sub> , H <sub>6'</sub> )                                    |

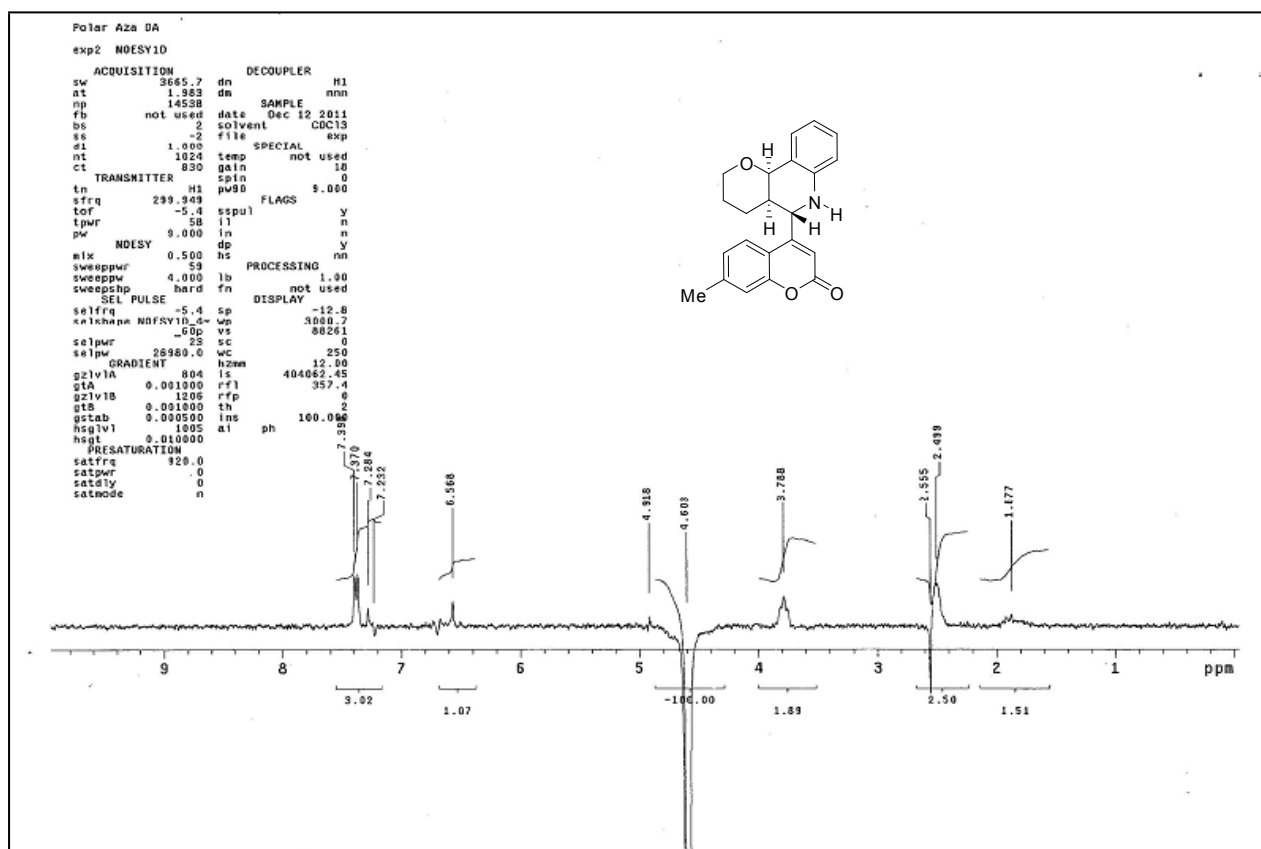

NOE spectrum of **11a'**

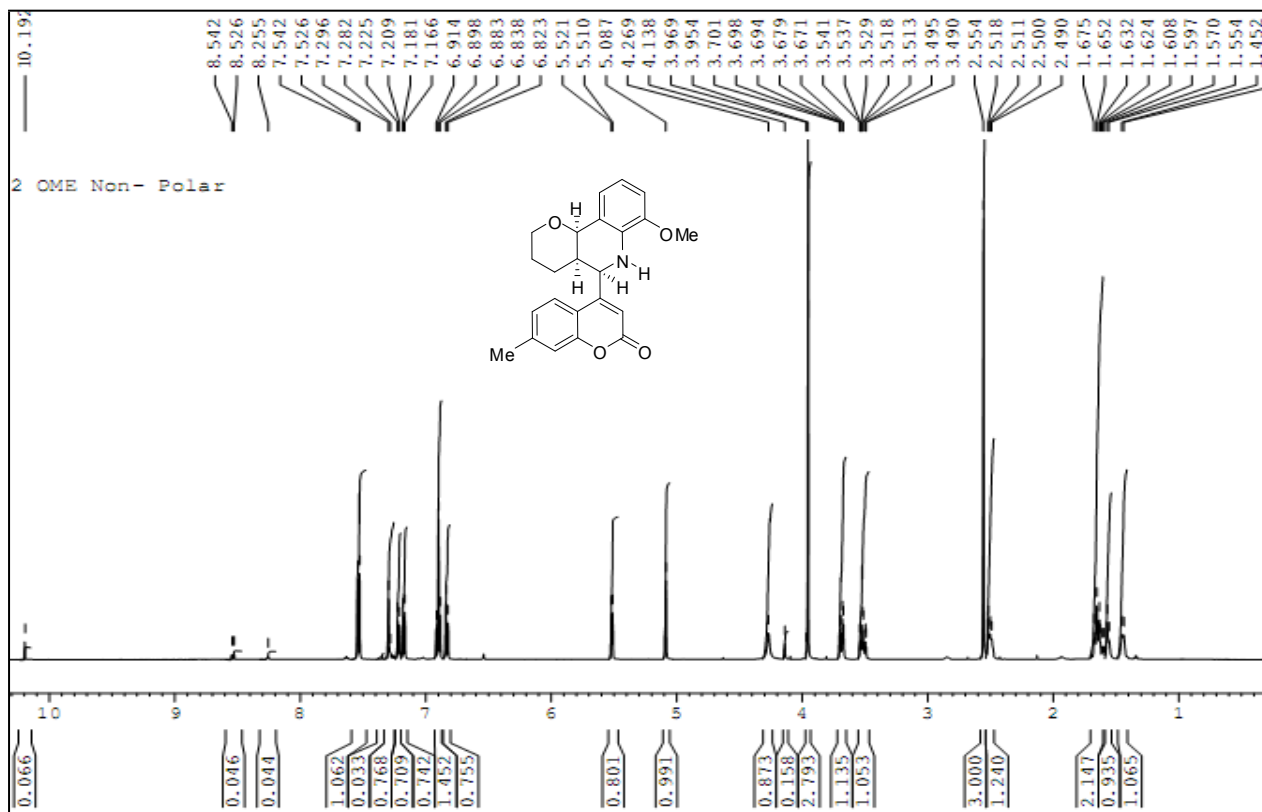

$^1\text{H}$  NMR (500 MHz) spectrum of **12a**

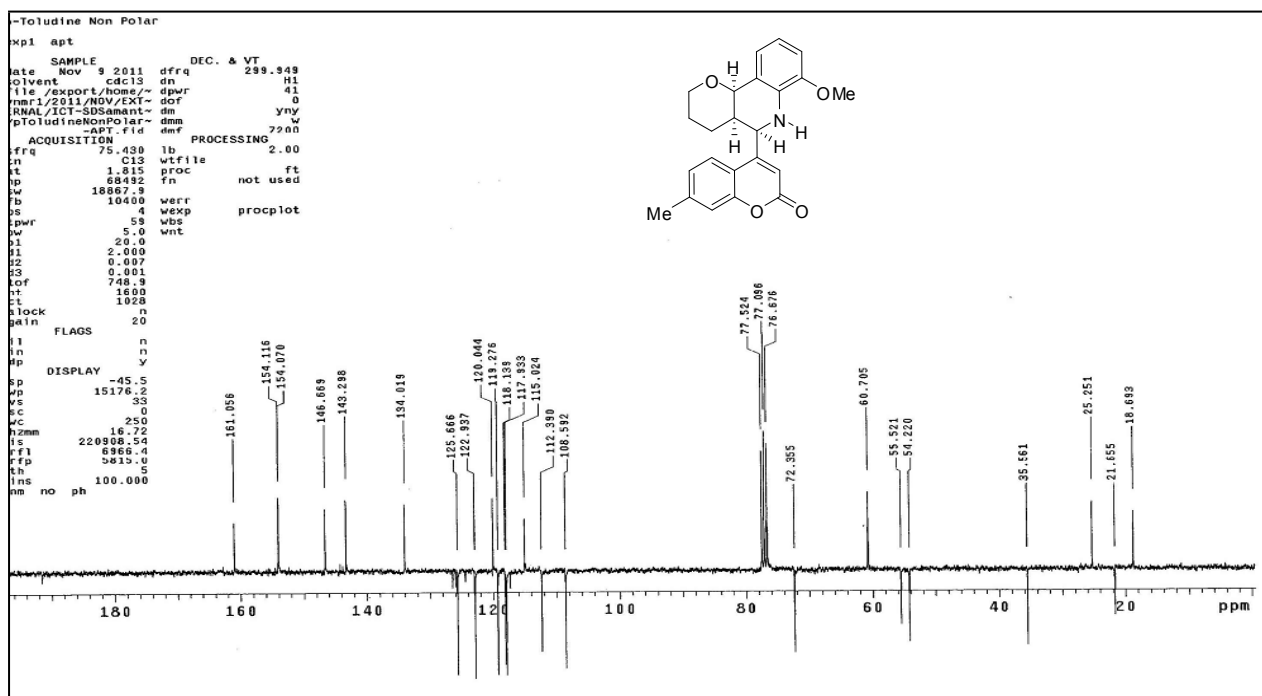

$^{13}\text{C}$  NMR (75 MHz) spectrum of **12a**

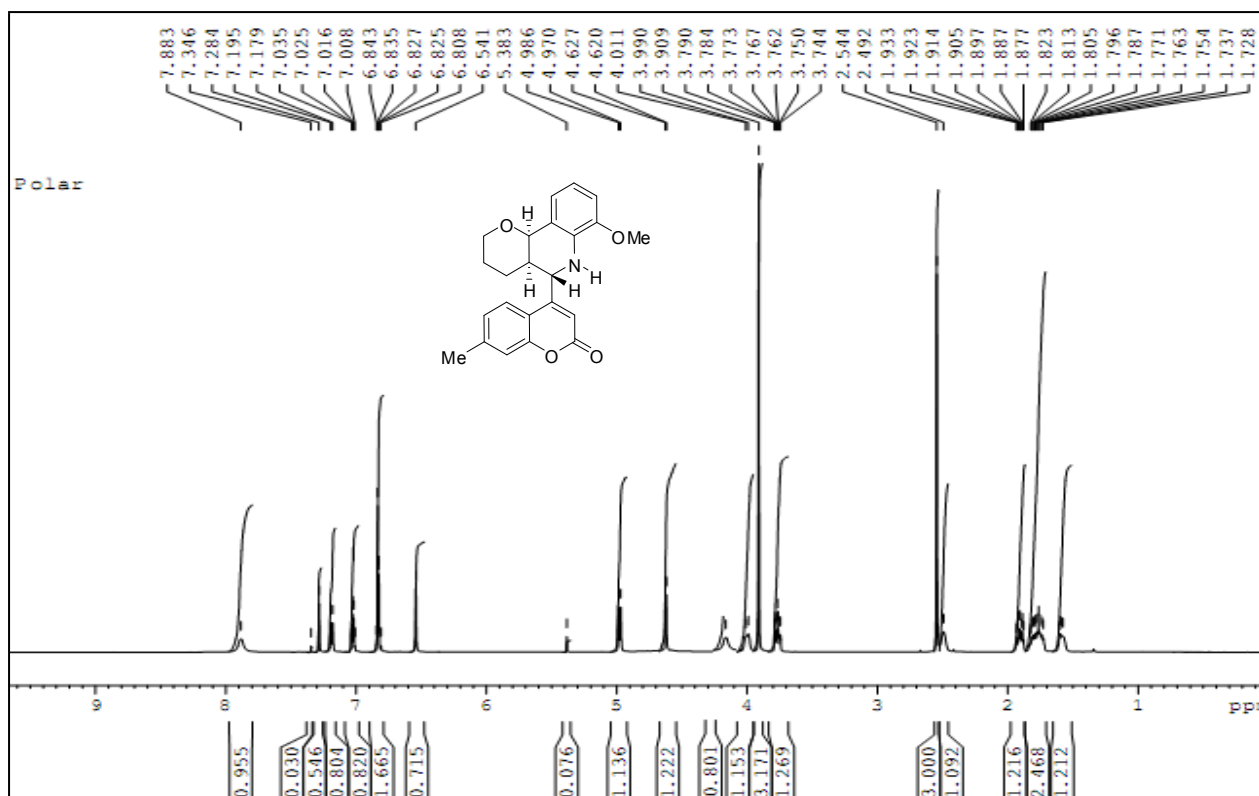

<sup>1</sup>H NMR (500 MHz) spectrum of **12a'**

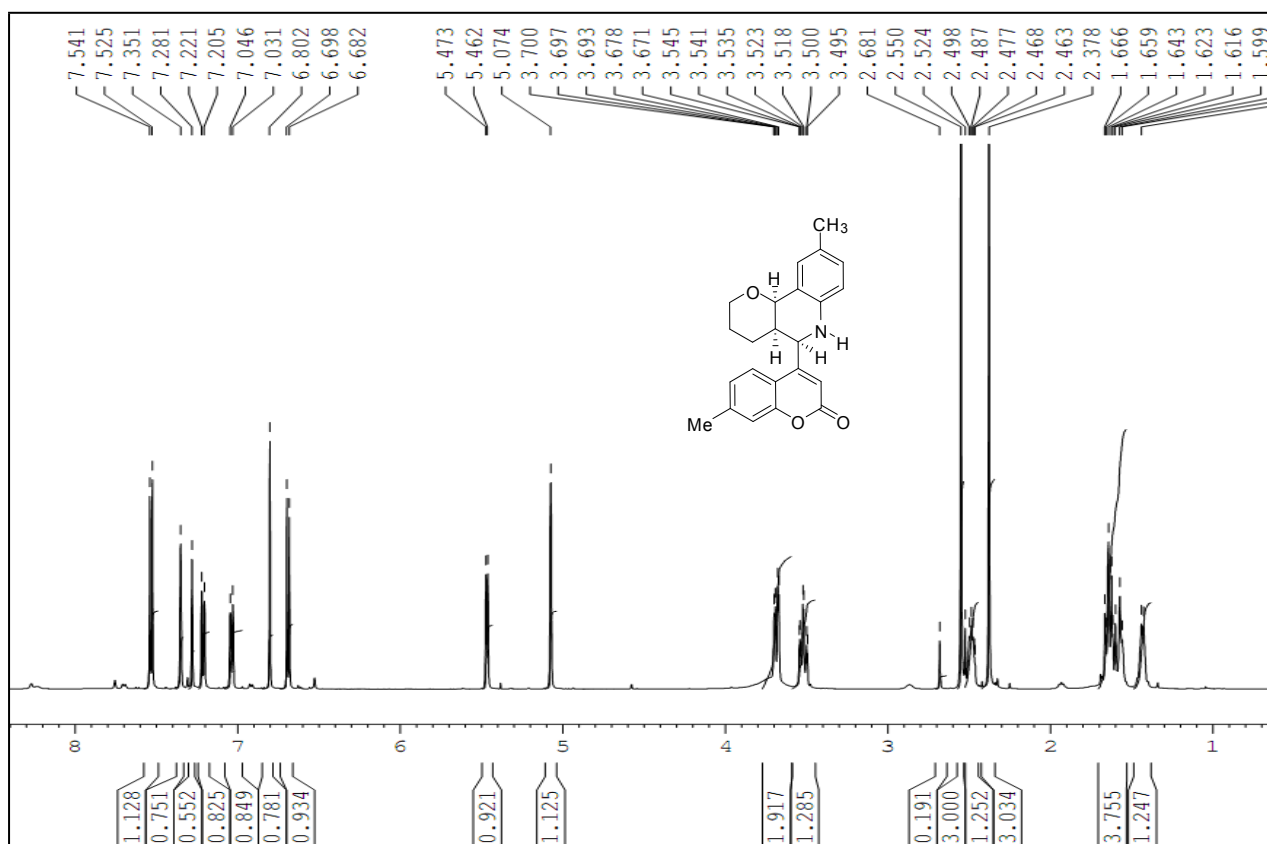

<sup>1</sup>H NMR (500 MHz) spectrum of **13a**

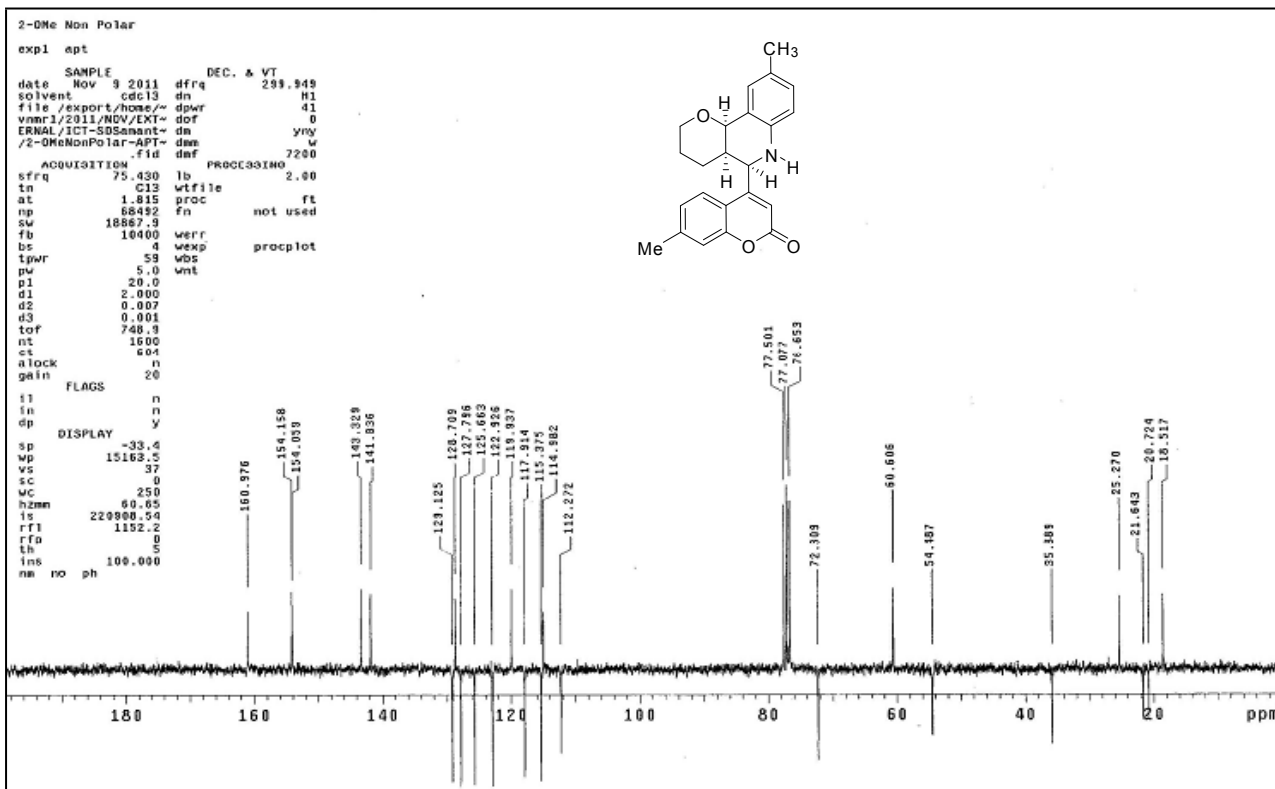

$^{13}\text{C}$  NMR (75 MHz) spectrum of **13a**

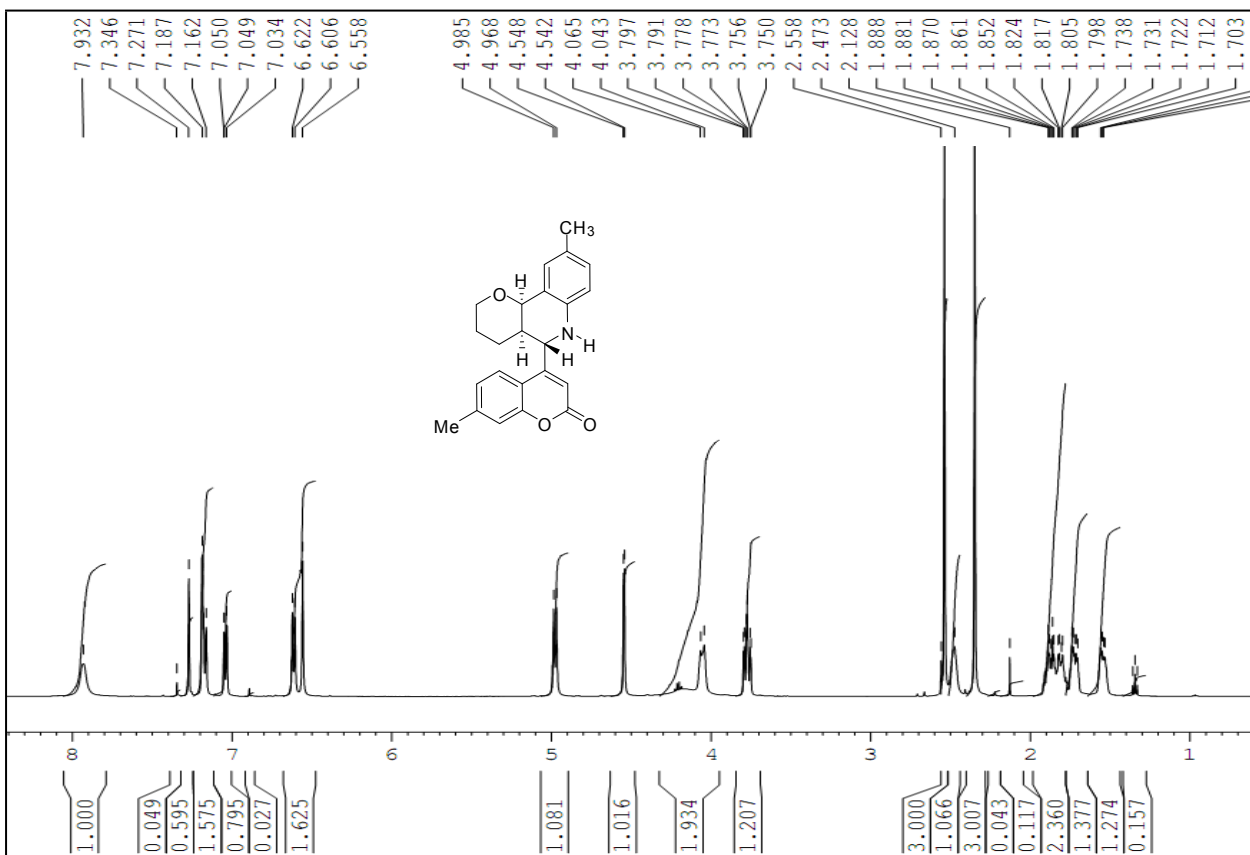

$^1\text{H}$  NMR (500 MHz) spectrum of **13a'**

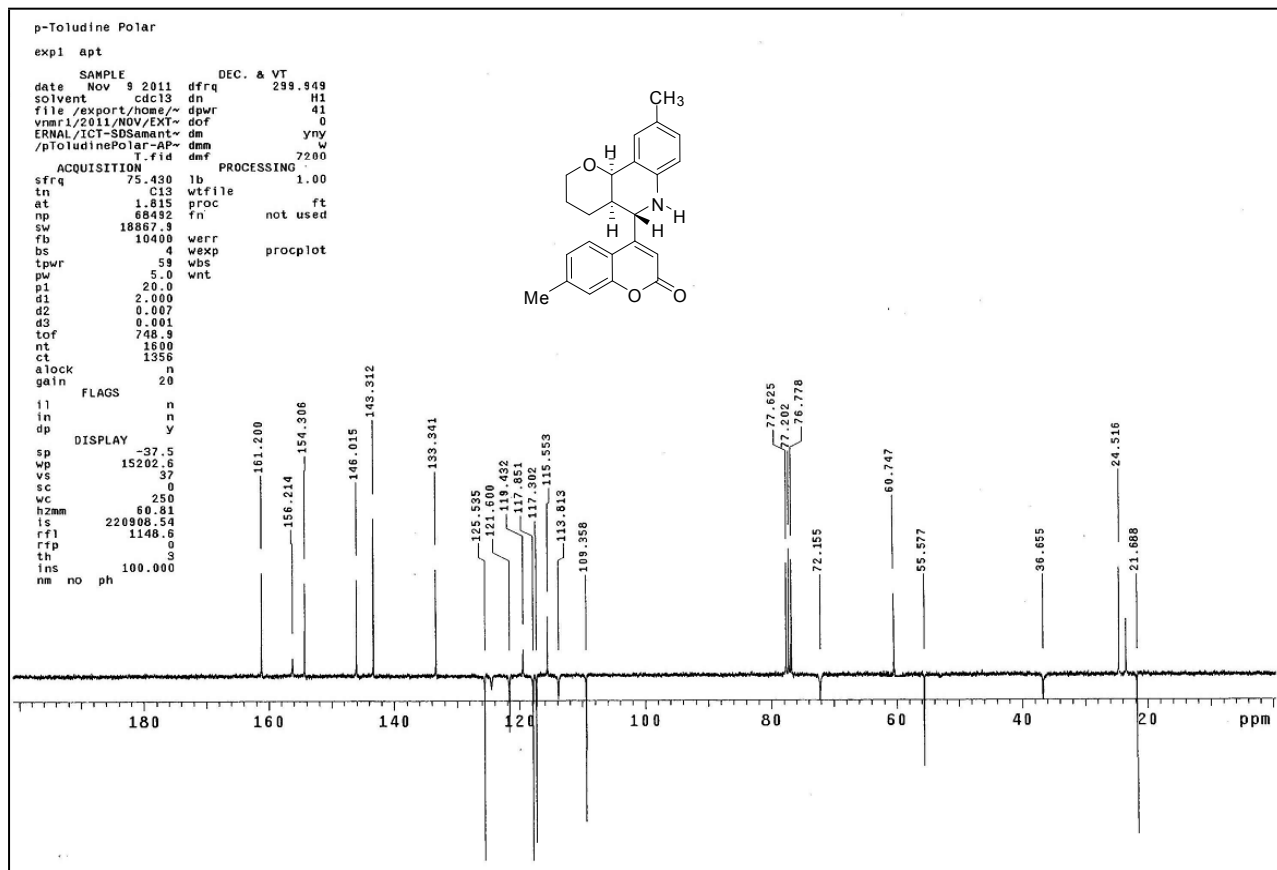

<sup>13</sup>C NMR (75 MHz) spectrum of **13a'**

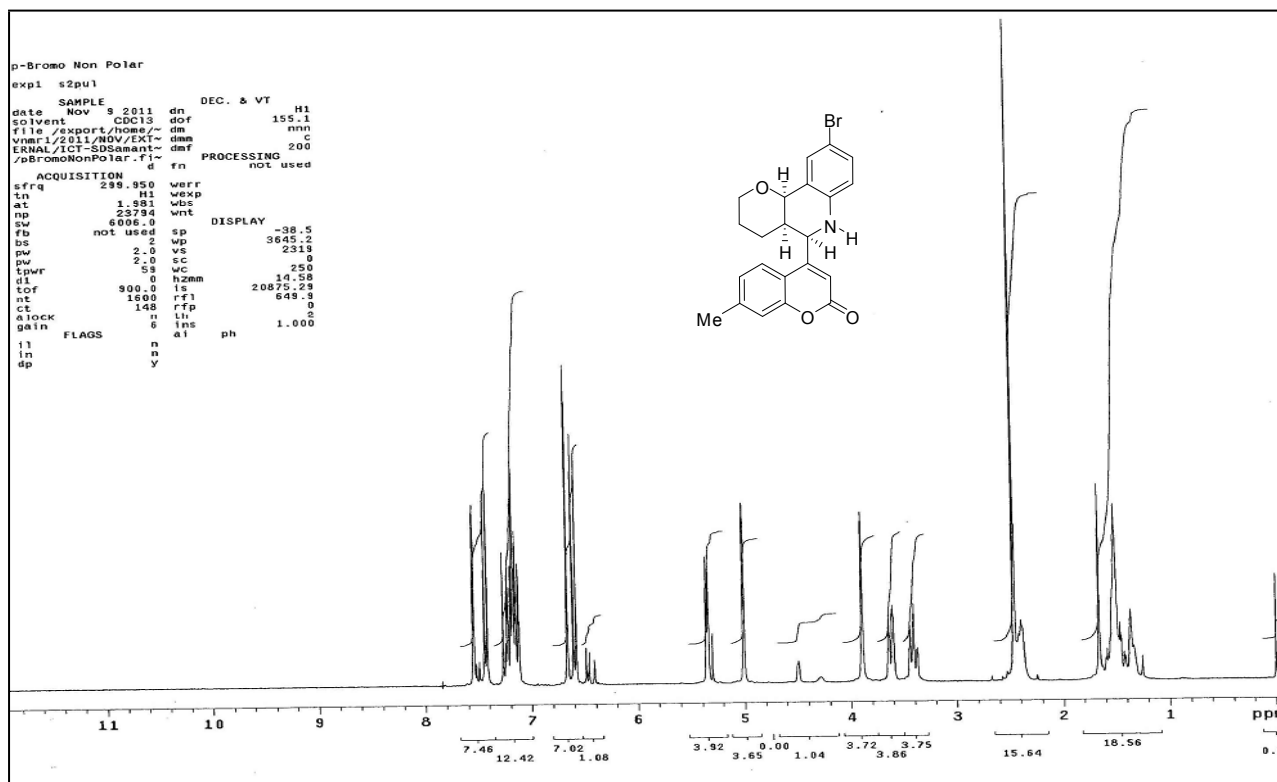

<sup>1</sup>H NMR (300 MHz) spectrum of **14a**

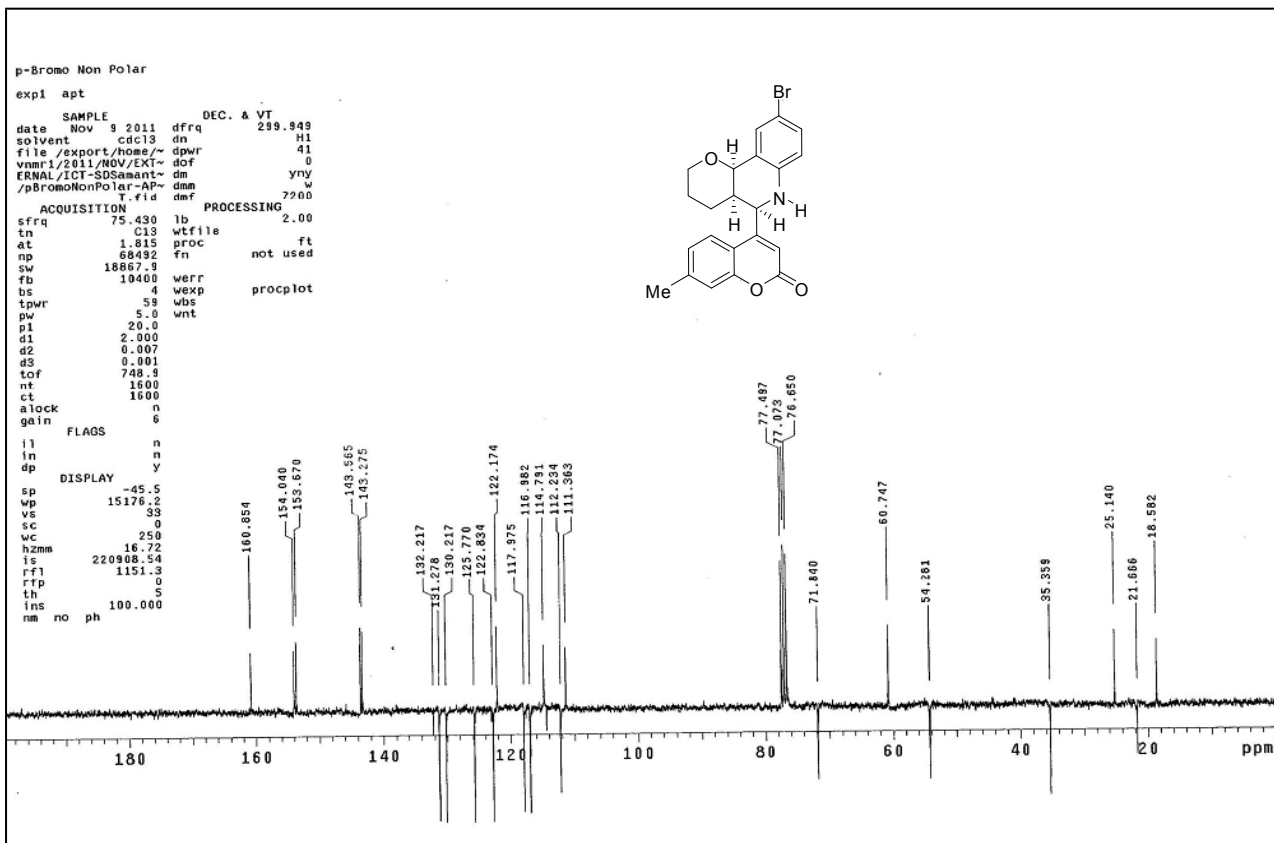

<sup>13</sup>C NMR (75 MHz) spectrum of 14a

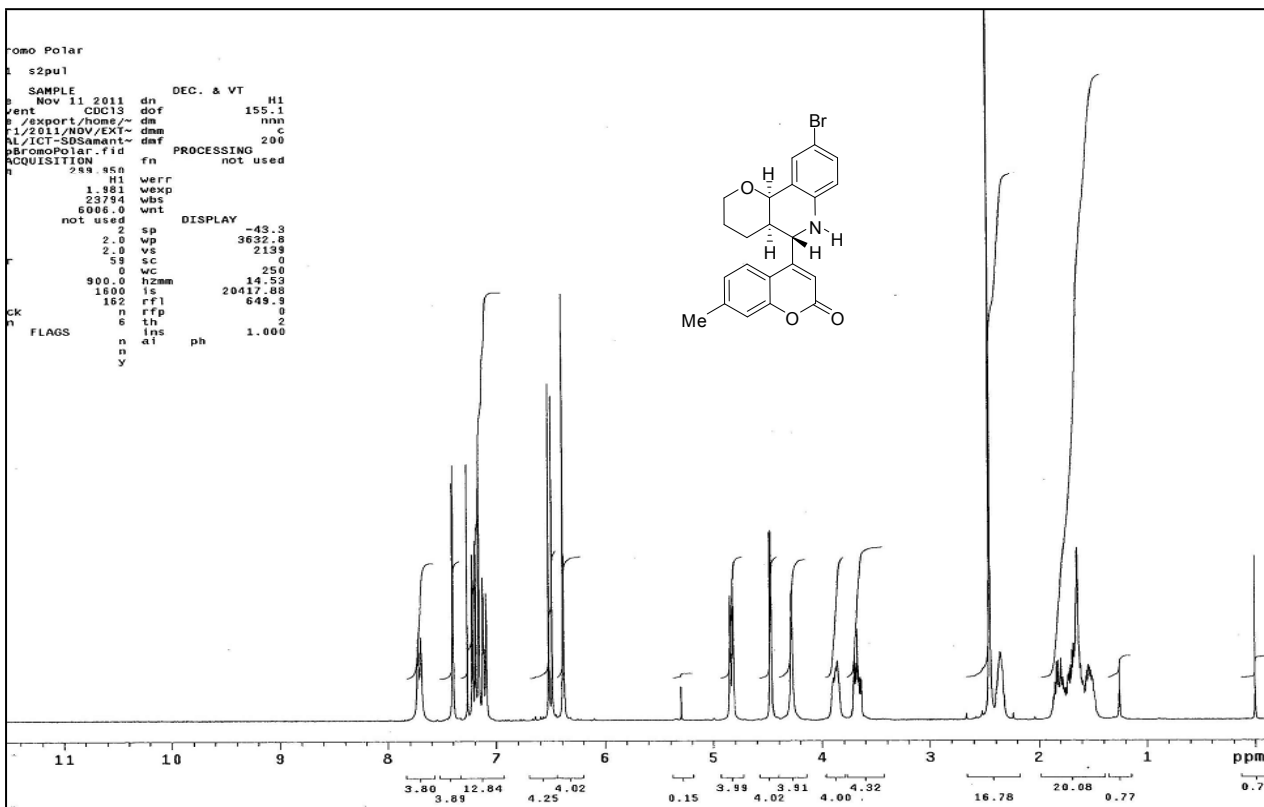

<sup>1</sup>H NMR (300 MHz) spectrum of 14a'

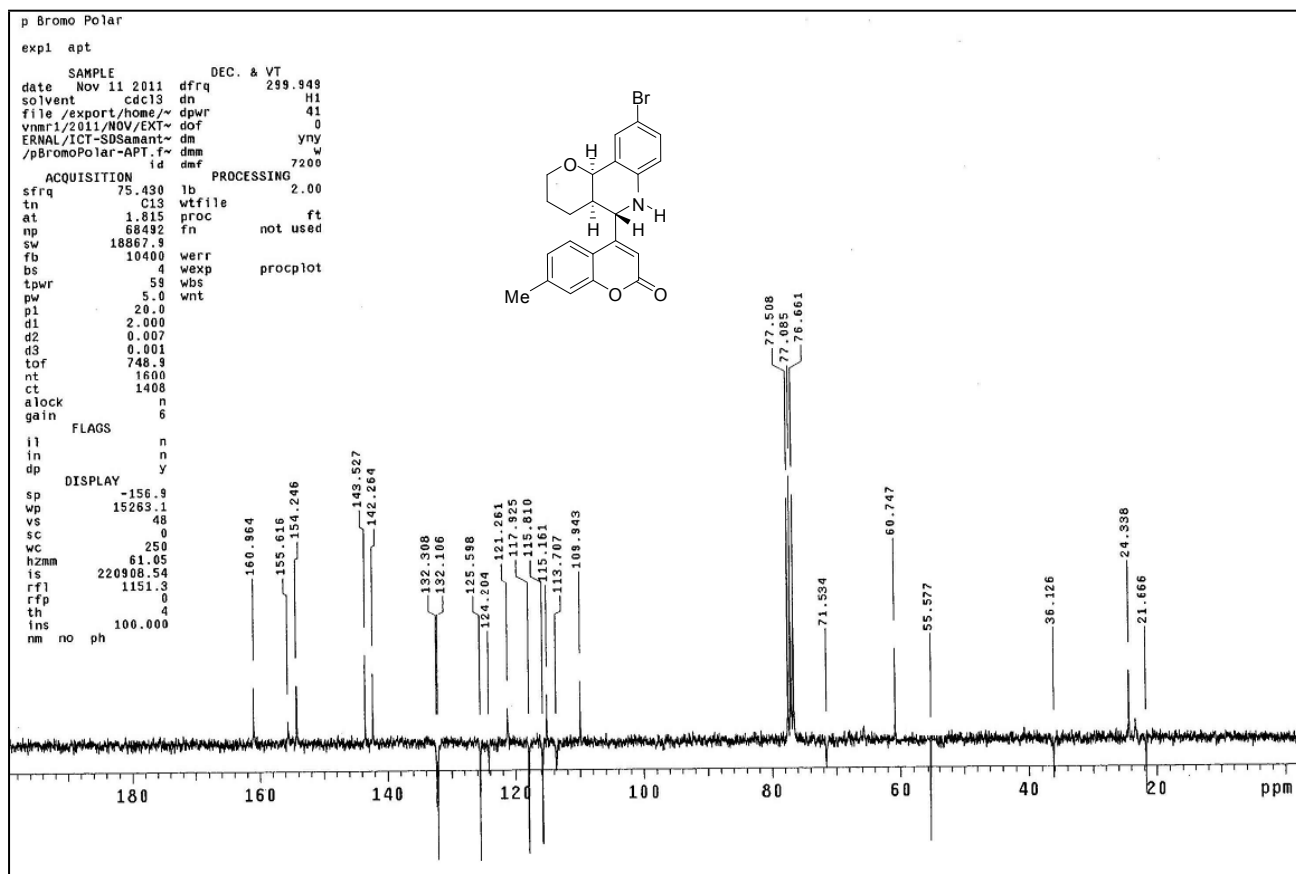

<sup>13</sup>C NMR (75 MHz) spectrum of **14a**

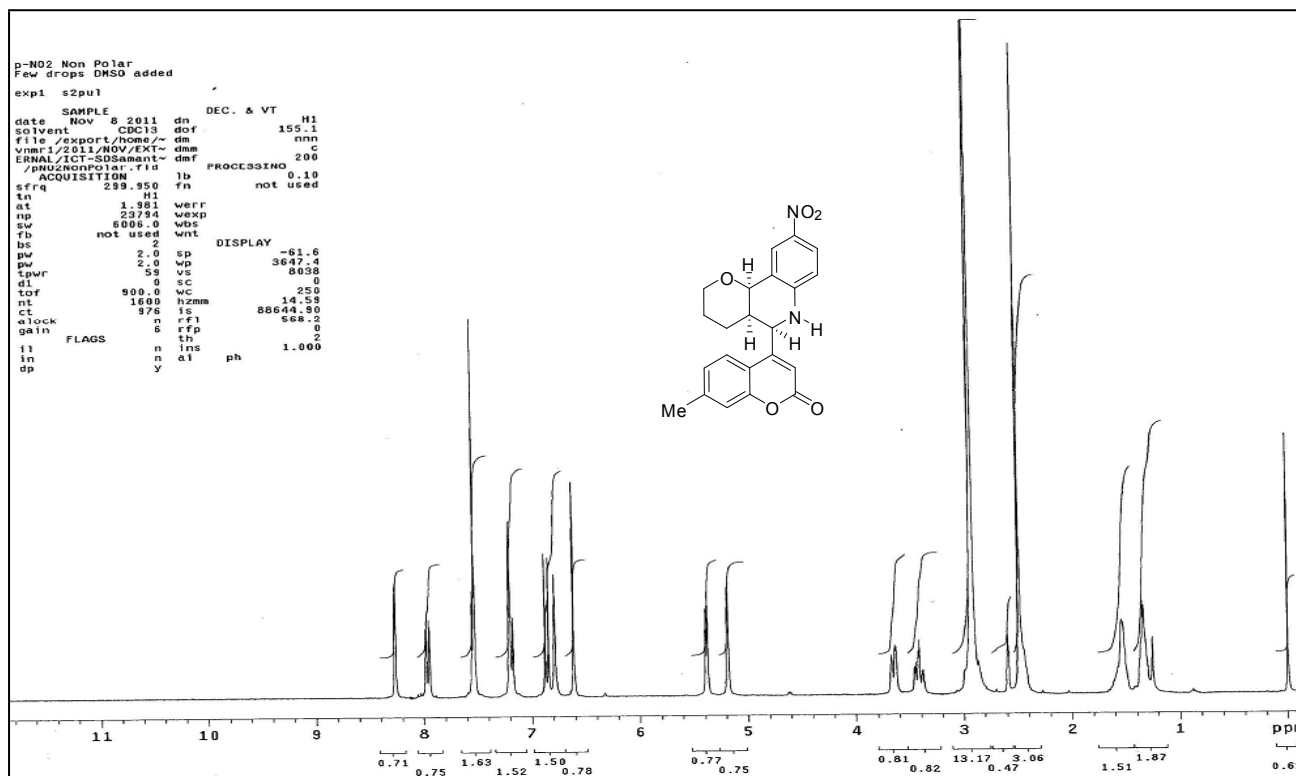

<sup>1</sup>H NMR (300 MHz) spectrum of **15a**



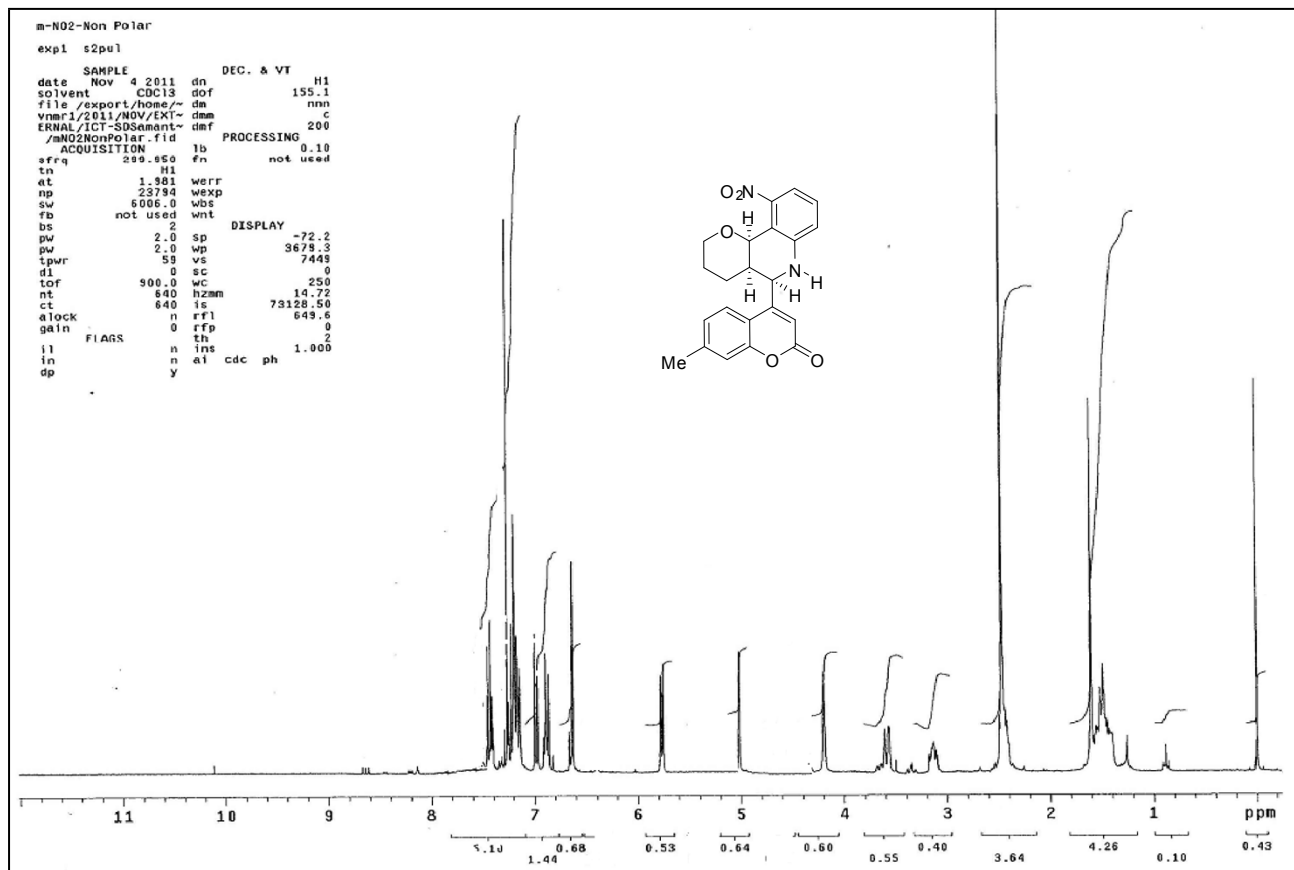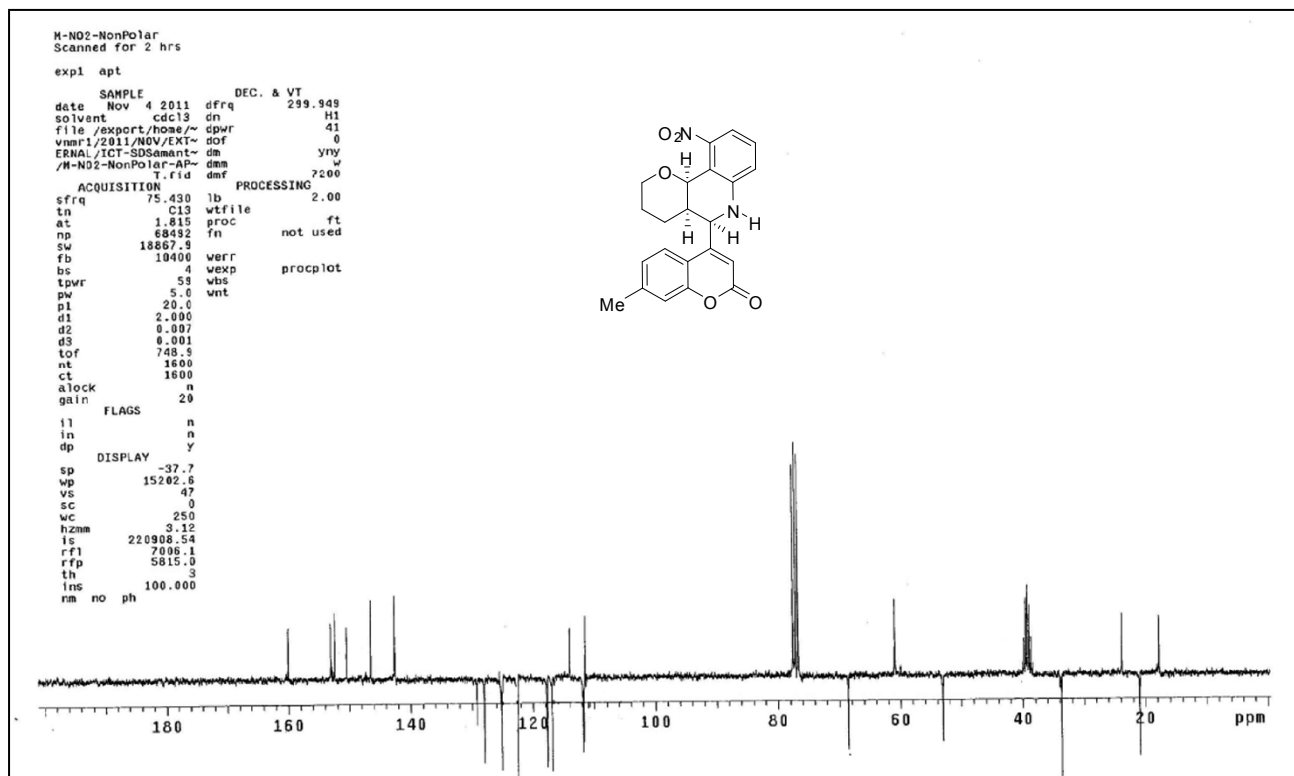

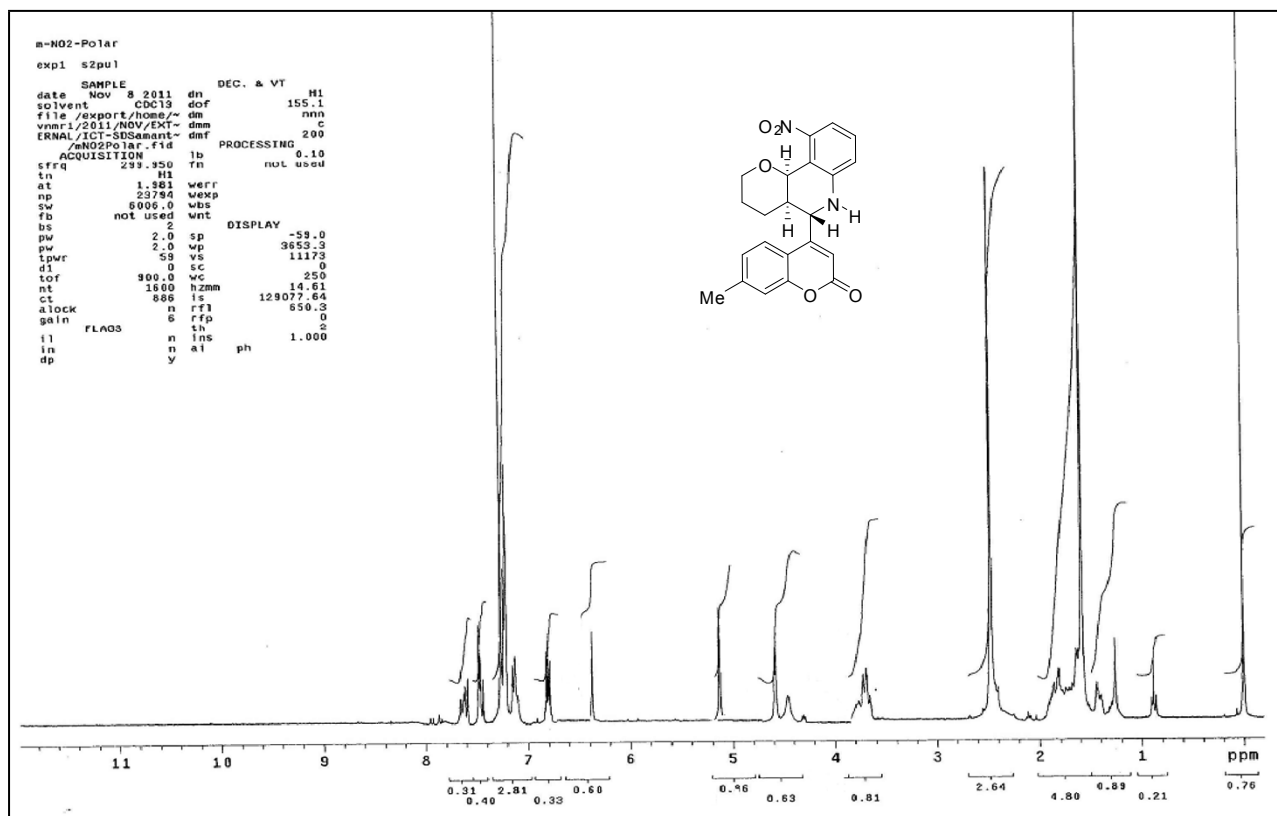

<sup>1</sup>H NMR (300 MHz) spectrum of **16a'**

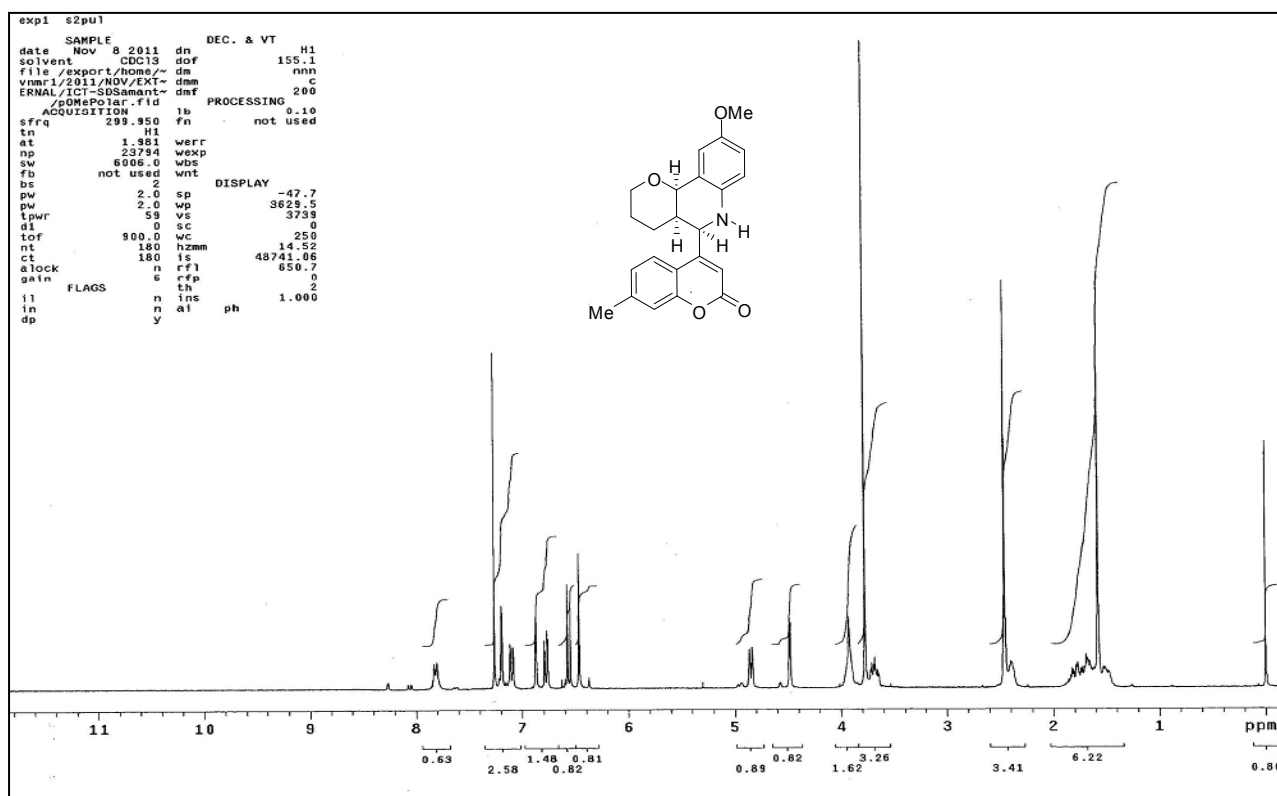

<sup>1</sup>H NMR (300 MHz) spectrum of **17a**

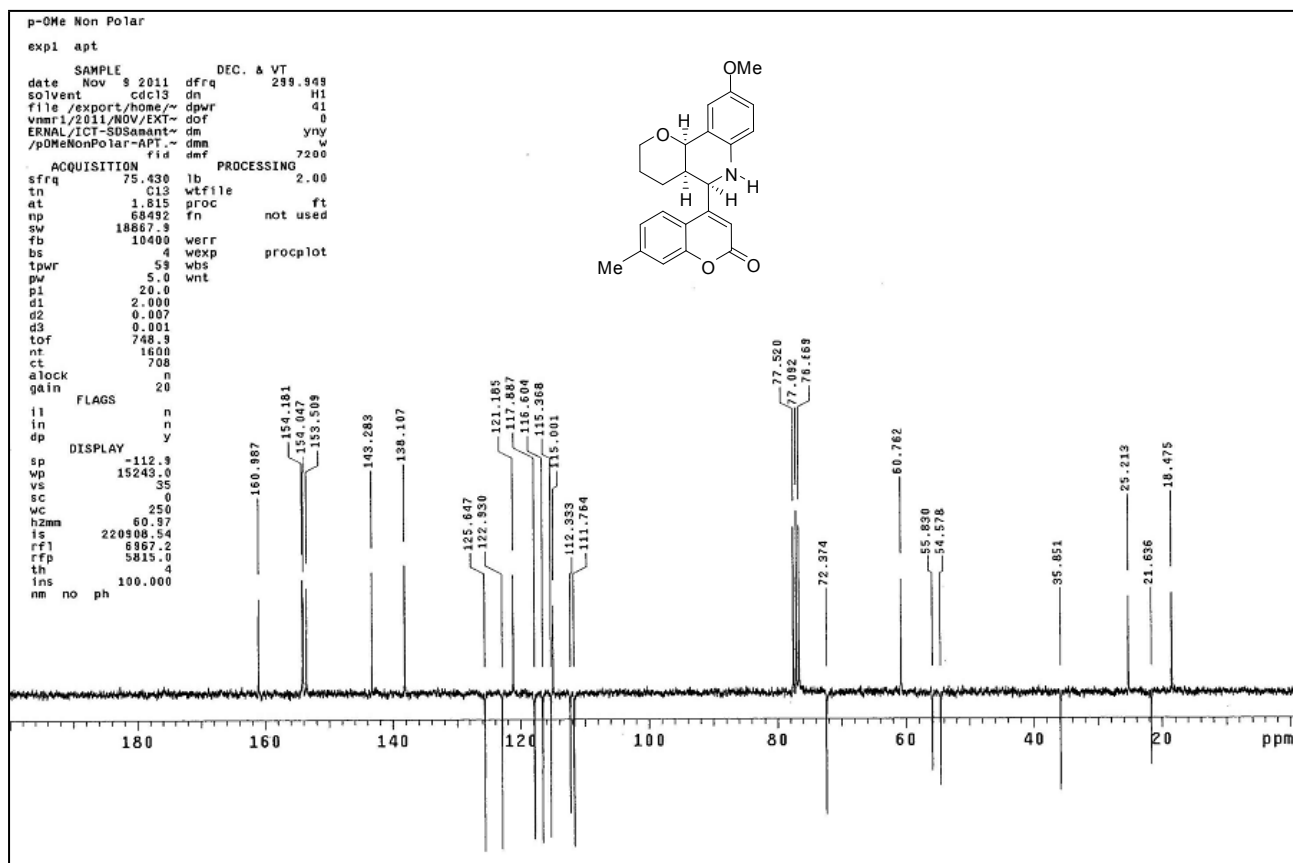

<sup>13</sup>C NMR (75 MHz) spectrum of **17a**

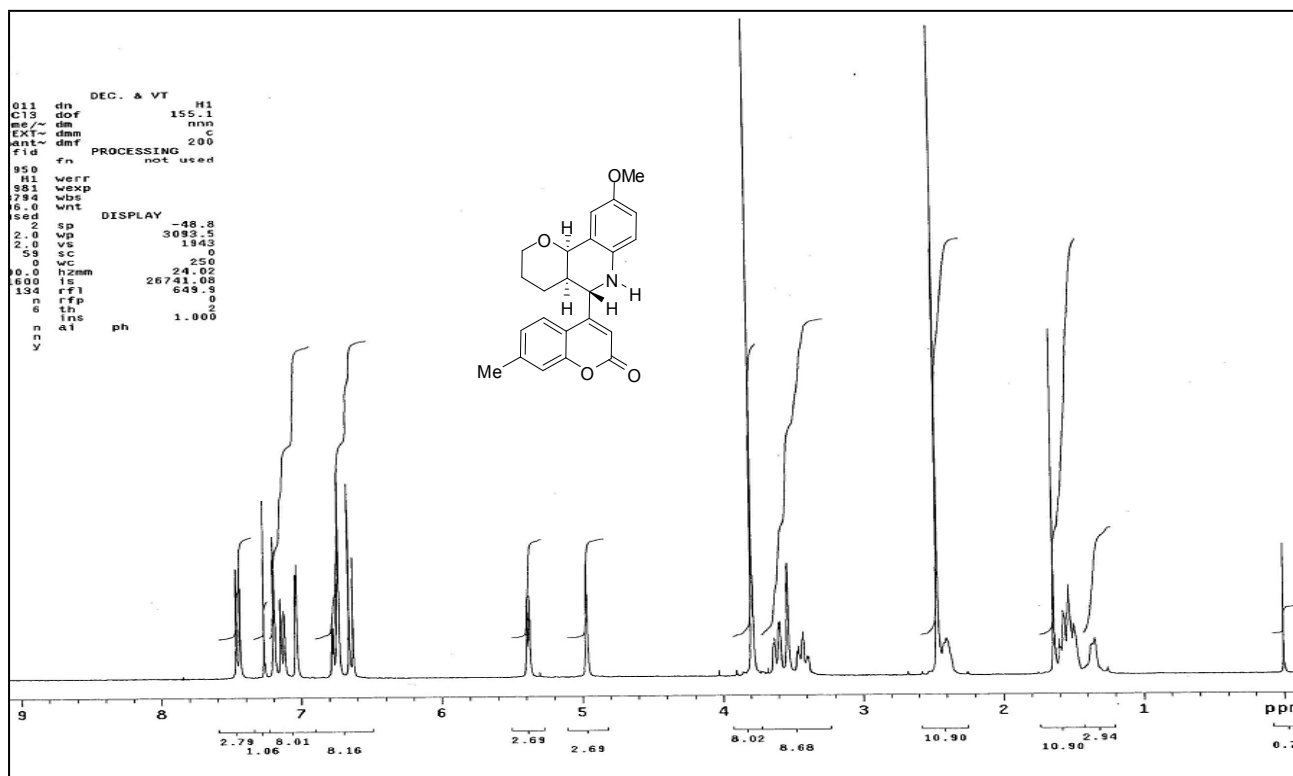

<sup>1</sup>H NMR (300 MHz) spectrum of **17a**

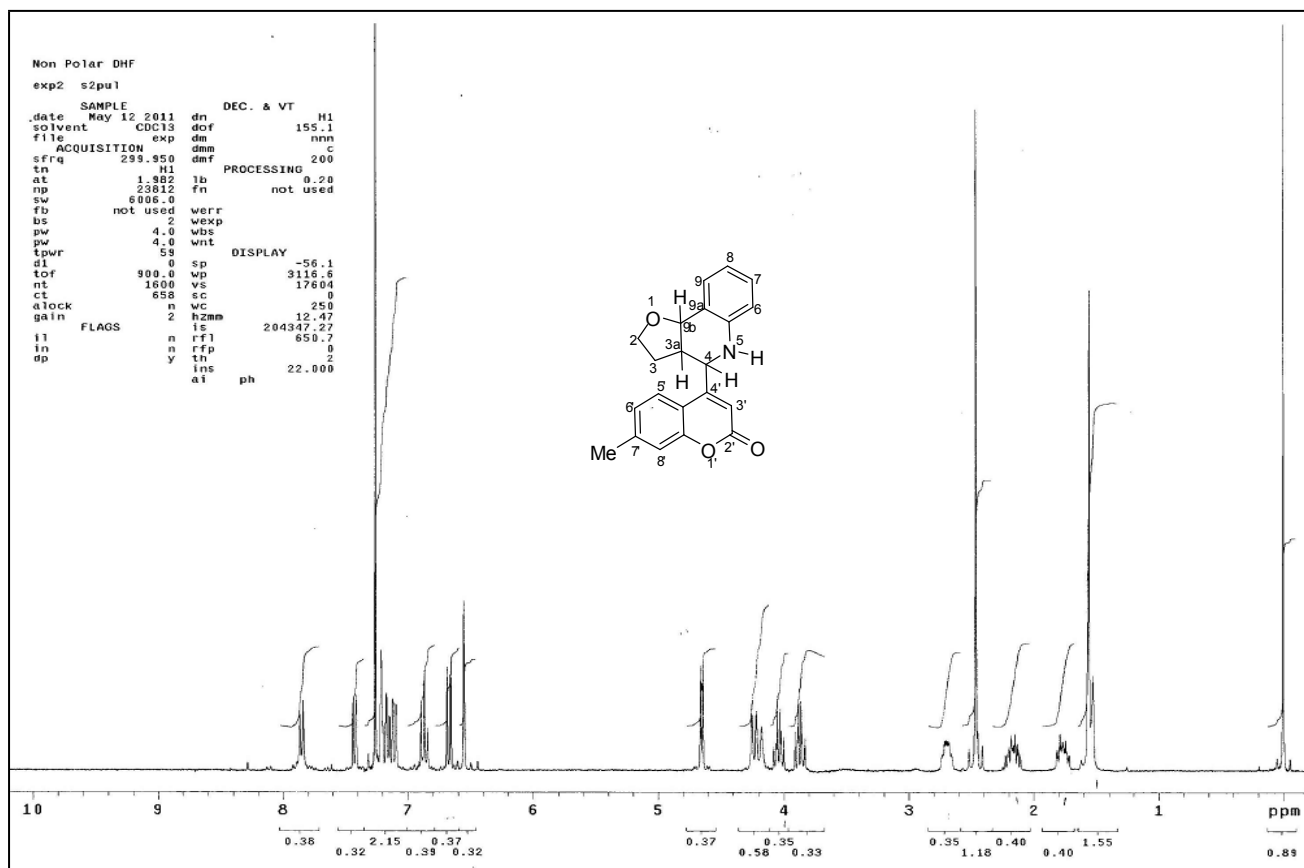

<sup>1</sup>H NMR (300 MHz) spectrum of **20a**

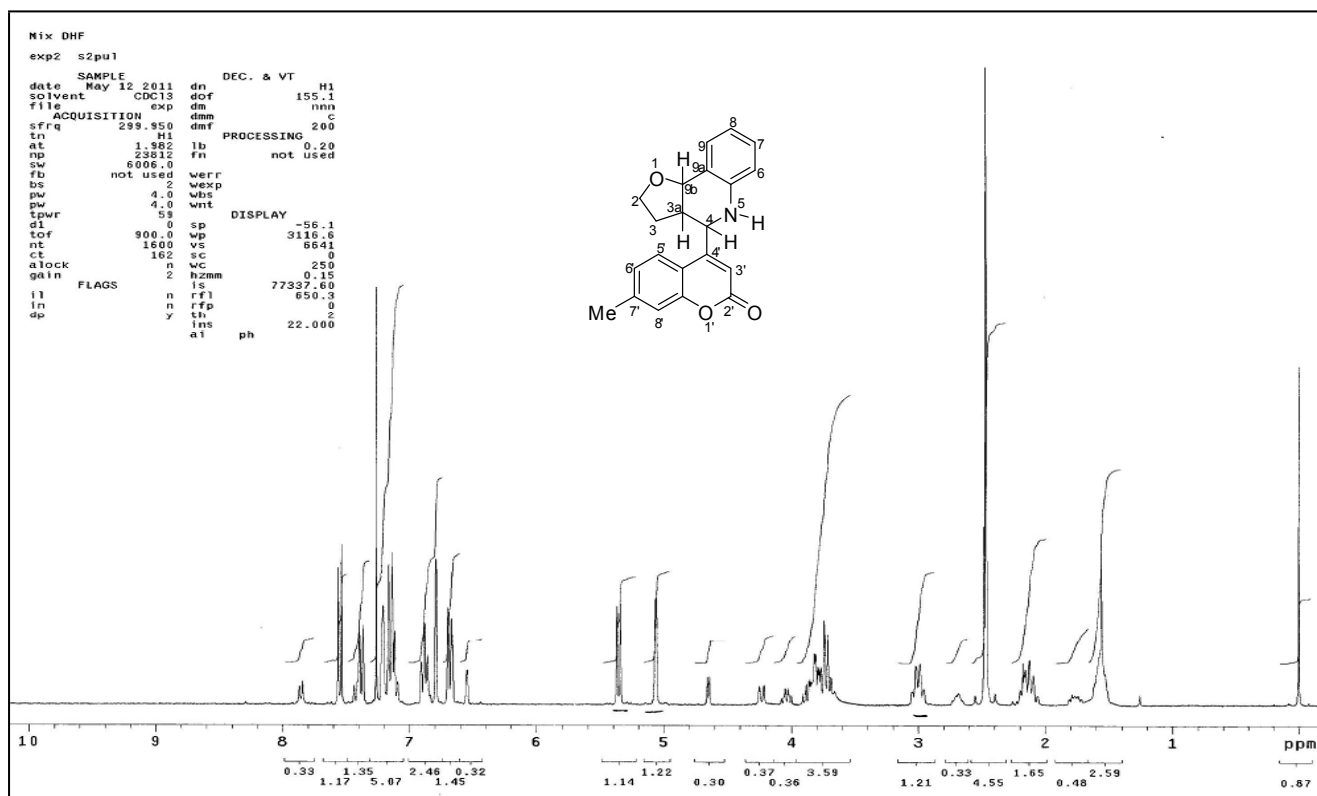

<sup>1</sup>H NMR (300 MHz) spectrum of mixture of **20a** + **20a'**

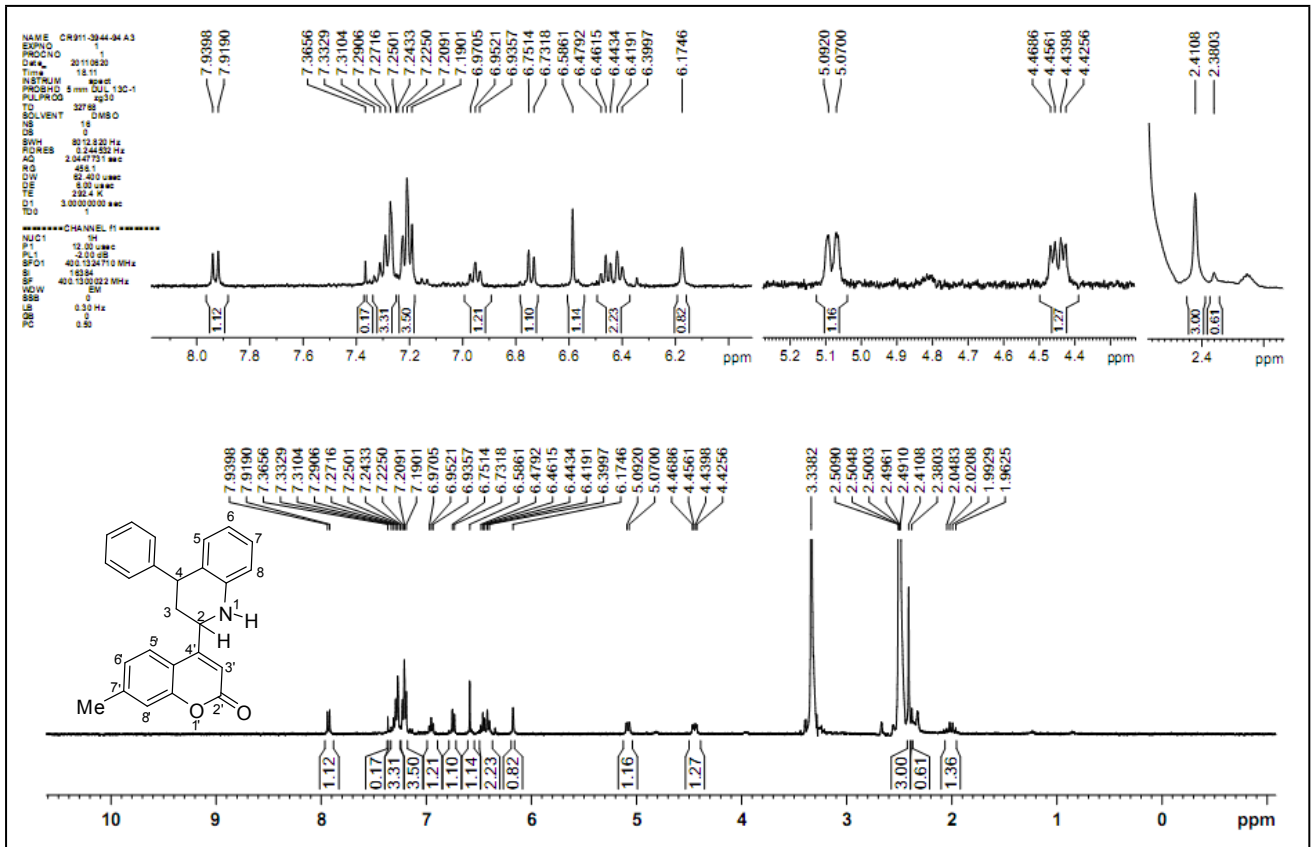

<sup>1</sup>H NMR (400 MHz) spectrum of 21a

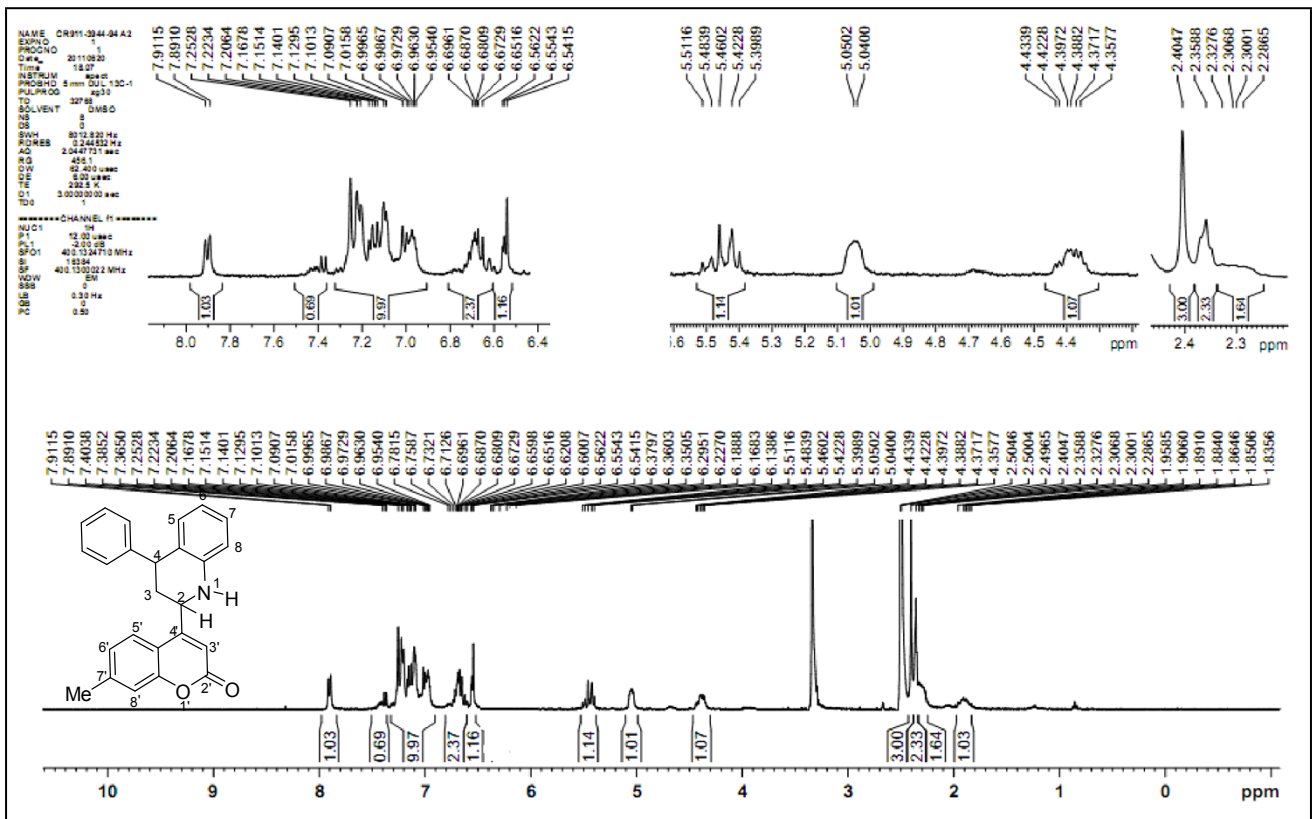

<sup>1</sup>H NMR (400 MHz) spectrum of 21a'
